1     **DISPARITIES IN ABO BLOOD TYPE DETERMINATION ACROSS DIVERSE ANCESTRIES:**  
2     **A SYSTEMATIC REVIEW AND VALIDATION IN THE *ALL OF US* RESEARCH PROGRAM**

3  
4     Kiana L. Martinez,<sup>1</sup> Andrew Klein,<sup>1</sup> Jennifer R. Martin,<sup>1,2</sup> Chinwuanuju U. Sampson,<sup>1</sup> Jason B.  
5     Giles,<sup>1</sup> Madison L. Beck,<sup>1</sup> Krupa Bhakta,<sup>1</sup> Gino Quatraro,<sup>1</sup> Juvie Farol,<sup>3</sup> Jason H. Karnes<sup>1,5,\*</sup>

6  
7     <sup>1</sup>Department of Pharmacy Practice and Science, The University of Arizona R. Ken Coit College  
8     of Pharmacy, Tucson, AZ

9     <sup>2</sup>The University of Arizona Health Sciences Library, The University of Arizona, Tucson AZ

10    <sup>3</sup>Department of Clinical and Translational Science, The University of Arizona College of  
11    Medicine, Tucson AZ

12    <sup>4</sup>Department of Biomedical informatics, Vanderbilt University Medical Center, Nashville, TN

13  
14    \*Correspondence to:

15  
16    Jason H. Karnes, PharmD, PhD

17    Associate Professor

18    University of Arizona R. Ken Coit College of Pharmacy

19    1295 N Martin AVE

20    Tucson, AZ 85721

21    520-626-1447

22    [karnes@arizona.edu](mailto:karnes@arizona.edu)

23

24

25

26

27 **Abstract**

28

29 **Background:**

30 ABO blood types have widespread clinical use and robust associations with cardiovascular  
31 disease. Many studies determine ABO blood types using tag single nucleotide polymorphisms  
32 (tSNPs) to characterize functional variation. However, tSNPs with low linkage disequilibrium  
33 (LD) may promote misinference of ABO blood types, particularly in diverse populations.

34 **Methods:**

35 Bibliographic databases were searched for studies (2005-2022) using tSNPs to determine ABO  
36 alleles in accordance with PRISMA 2020 guidelines. We calculated linkage between tSNPs and  
37 functional variants across inferred continental ancestry groups from 1000 Genomes (AFR, AMR,  
38 EAS, EUR). We compared  $r^2$  across ancestry and assessed real-world consequences by  
39 comparing tSNP-derived blood types to serology in a large, diverse population from the *All of Us*  
40 Research Program (AoURP).

41 **Results:**

42 We observe a lack of phasing and frequent use of inappropriate tSNPs in blood type  
43 determination, particularly for O alleles. Linkage between functional variants and O allele tSNPs  
44 was significantly lower in African (median  $r^2=0.443$ ) compared to East Asian ( $r^2=0.946$ ,  
45  $p=1.1 \times 10^{-5}$ ) and European ( $r^2=0.869$ ,  $p=0.023$ ). In AoURP, discordance between tSNP-derived  
46 blood types and serology was high across all SNPs in African ancestry individuals and linkage  
47 was strongly correlated with discordance across all ancestries ( $\rho=-0.90$ ,  $p=3.08 \times 10^{-23}$ ).

48 **Conclusion:**

49 We observe common use of inappropriate tSNPs to determine ABO blood type, particularly for  
50 O alleles and with some tSNPs mistyping up to 58% of individuals. Our results highlight the lack  
51 of transferability of tSNPs across ancestries and potential exacerbation of disparities in genomic  
52 research for underrepresented populations.

## 53 Introduction

54 Patients with European ancestry make up 12% of the world's population, but account for  
55 approximately 81% of individuals in genomic studies<sup>1,2</sup>. This lack of representation in genomic  
56 studies has led to multiple racial and ethnic disparities in genomic research. Among such  
57 disparities is the assumption that tag single-nucleotide polymorphisms (tSNPs) are appropriate  
58 proxies for functional variation across ancestry groups. Because of differences in minor allele  
59 frequency (MAF) and linkage disequilibrium (LD) structure, tSNPs are not always portable  
60 across ancestry groups and inappropriate use of tSNPs may lead to reduced statistical power  
61 and erroneous associations<sup>3,4</sup>. This practice may exacerbate existing disparities in genomic  
62 research for underrepresented populations, especially when important clinical traits are inferred  
63 based on tSNP variation.

64 ABO blood types have widespread clinical use, are among the first biomarkers tested in  
65 the newborn, and are robustly associated with myriad phenotypes, such as hemolytic disease of  
66 the newborn transfusion and solid organ transplant-related complications, and thromboembolic  
67 disease<sup>5-9</sup>. Individuals with non-O blood types have been shown to have increased risk for  
68 coronary artery disease, myocardial infarction, deep vein thrombosis, and stroke<sup>10-13</sup>. The four  
69 ABO blood groups (A, B, AB, and O) are largely the result of a small number of functional  
70 variants that produce combinations of ABO alleles (A, B, and O)<sup>14-16</sup>. While serological typing is  
71 considered the gold standard for determining ABO blood types, studies often determine ABO  
72 blood type using genetic data when serological typing results are not collected or not  
73 available<sup>17,18</sup>. These studies often use tSNPs to determine ABO blood type because important  
74 functional variation in ABO includes single base pair insertion/deletion polymorphisms that are  
75 not easily or accurately characterized on arrays or with genome-wide imputation<sup>19</sup>. Additionally,  
76 most ABO tSNPs used to identify blood groups were originally identified in European and East  
77 Asian populations<sup>20,21</sup>, leading to the possibility that tSNPs are used inappropriately in diverse  
78 populations<sup>4</sup>.

79 Many diverse populations, including those with admixed American and African ancestry,  
80 are included in studies that infer ABO blood groups based on genetic variants<sup>22-25</sup>. However,  
81 many of the commonly utilized tSNPs in ABO are unlikely to accurately capture functional  
82 variation in these populations due to differences in LD patterns and MAFs<sup>21,26</sup>. In this study, our  
83 primary aim is to evaluate the portability and suitability of tSNPs used to determine ABO alleles  
84 and blood types across diverse populations in published literature. We aimed to evaluate  
85 inconsistencies in racial/ethnic representation and bioinformatic methodologies across  
86 published studies investigating genotype-derived ABO blood groups. Finally, we investigated  
87 the real-world consequences of utilization of tSNPs from existing studies through examination of  
88 LD patterns, genotype-derived ABO blood groups, and ABO serological test results from the  
89 diverse participants in the *All of Us* Research Program (AoURP).

90

## 91 **Methodology**

92 In the systematic review portion of this study, we captured all recent publications  
93 (publication dates 2005-2022) that used single-nucleotide polymorphisms (SNPs) to determine  
94 ABO alleles (A, B, and O). ABO alleles are derived from pre-defined functional variants and are  
95 used to determine ABO blood types: OO (O blood type); AA, AO (A blood type); BB, BO (B  
96 blood type); AB (AB blood type). We identified and recorded SNPs, either functional variants or  
97 tSNPs, that were used to determine ABO alleles. As studies did not report LD between their  
98 utilized tSNPs and functional variants within their population, we calculated LD using  $r^2$  in  
99 reference populations provided by the 1000 Genomes Project (1KGP)<sup>27</sup>. Because studies also  
100 rarely reported genetically-derived ancestry for their populations, we inferred continental  
101 ancestry from 1KGP superpopulations (African ancestry [AFR], Admixed American ancestry  
102 [AMR], East Asian ancestry [EAS], European ancestry [EUR], and South Asian ancestry [SAS])  
103 to estimate  $r^2$  between functional variants and tSNPs. To evaluate the real-life consequences of  
104 utilizing potentially inappropriate tSNPs in place of functional variants, we compared ABO blood

105 types and alleles derived from tSNPs utilized in existing studies, functional variants, and ABO  
106 serology test results in the diverse population with whole genome sequencing from the  
107 AoURP<sup>28</sup>. We calculated discordance between these different derivations of ABO blood types  
108 and alleles across ancestries in the AoURP. Approval for human subjects research was not  
109 required since all data used in this study was publicly available. Research conducted within the  
110 AoURP is considered non-human subjects research since all data were de-identified and  
111 available for public access.

### 112 Systematic Review Search Strategy, Inclusion Criteria, Data Extraction, and Derived Data

113 We conducted a systematic search for peer-reviewed publications (2005-2022) that used  
114 SNPs to determine ABO blood types (**Figure 1**). The results of this review is reported in  
115 accordance with the Preferred Reporting Items for Systematic reviews and Meta-Analyses  
116 (PRISMA) 2020 statement and checklist<sup>29</sup>. Detailed descriptions of the search strategy,  
117 inclusion criteria, data extraction, and derived data are presented in the Supplemental Materials  
118 (See **Supplemental Methods** and **Tables S1-S6**). We utilized the reference management tool  
119 EndNote 20 (Clarivate, Philadelphia, PA, USA) for the initial compilation of references based on  
120 our search strategy, and then used DistillerSR (DistillerSR, Ottawa, Canada) as our literature  
121 reviewer software that enabled us to efficiently screen references and extract data. The  
122 following bibliographic databases were searched: PubMed/Medline (National Library of  
123 Medicine), Embase (Elsevier), Scopus (Elsevier), Ovid/Medline (Wolters Kluwer), and CINHAL  
124 Plus with Full Text (Ebsco). In addition, Dissertations and Theses Global (ProQuest) were also  
125 searched as well as Google Scholar. These searches were conducted within 1 week in August  
126 2022. Key words including MeSH (Medical Subject Heading) terms and free-text words were  
127 searched in titles, abstracts, and text. The full complete queries conducted in each database are  
128 provided in the **Supplementary Materials (Table S2)**.

129 The publications meeting the following criteria were included for the initial title and  
130 abstract evaluation: 1) available in the English language, 2) the organism being studied is

131 human, and 3) is a primary article. In a secondary evaluation we screened the full text and  
132 included only peer-reviewed articles that used single SNPs to derive ABO alleles from genomic  
133 data. Major exclusion criteria were: 1) clinical trials, 2) reviews, and 3) meta-analysis. The  
134 screening forms are available in **Table S3** and **Table S4**. The bibliographic information  
135 associated with each reference, such as reference title, authors, and journal, were automatically  
136 extracted by DistillerSR. The primary data extracted included: 1) SNPs used for each ABO  
137 allele, 2) presence of a haplotype analysis, 3) cohort size, 4) cohort population description, 5)  
138 primary phenotype of interest, and 6) sequencing/genotyping platform (**Table S4**). We ensured  
139 consistency of the collected data by having our data independently extracted by two different  
140 reviewers with disagreement between reviewers being resolved by consensus.

141 To better understand the range of phenotypes assessed in conjunction with ABO blood  
142 type, we categorized the primary phenotype of the studies into twelve categories  
143 (hematological, cardiovascular, oncology, infections disease, digestive system/gastrointestinal,  
144 inflammatory, immune system, hepatic, neurological, metabolic, miscellaneous, multiple  
145 phenotypes). Because genotyping technology influences the functional ABO variation that could  
146 be determined, we also collected sequencing and genotyping platforms used to determine the  
147 SNPs and ABO alleles. We categorized these platforms into four groups: 1) sequencing, 2)  
148 genotyping, 3) PCR/specific target, and 4) multiple genotyping/sequencing platforms. Definitions  
149 for these categories are available in the **Supplemental Materials**. Since the use of phased  
150 genetic data and imputation of haplotype structure is required to accurately determine ABO  
151 alleles (**Table S5**), we also identified how many studies used a haplotype analysis to assign  
152 functional variants or tSNPs to individual copies of chromosome nine.

### 153 *Inferred Continental Ancestry for Assessment of LD*

154 As our aim was to evaluate tSNPs across diverse populations, we were required to  
155 determine LD between tSNPs and functional variants, as well as describe reported populations  
156 in terms of continental ancestry. Since studies using tSNPs did not report population-specific LD

157 values for linkage between functional variants and tSNPs, we estimated LD using  $r^2$  from  
158 representative populations from 1KGP<sup>27</sup>. We used LDLink<sup>30</sup>, specifically the LDpop<sup>31</sup> module, to  
159 calculate  $r^2$  specific to super- and sub-populations as defined by 1KGP<sup>27</sup>. For our primary  
160 analysis,  $r^2$  was calculated for each of the 1KGP superpopulations (AFR, AMR, EAS, EUR, or  
161 SAS) that corresponded to each study population as described below. In studies where ABO  
162 functional variation was used,  $r^2$  was determined to be 1. In studies where more than one SNP  
163 was used and the population for which the SNP was used was not described, we assumed  
164 studies used the SNP with the highest  $r^2$  value for their population.

165 For each study in the systematic review, we inferred continental ancestry as described  
166 by the International Genome Sample Resource (IGSR) for their 1KGP<sup>27</sup> phase three collection.  
167 The vast majority of studies included in this systematic review did not describe genetically-  
168 derived ancestry for their participants. For example, many studies described their populations  
169 using racial terminology such as “White” or “Caucasian” or in terms of the population’s  
170 geography such as being “Japanese” or “Finnish”. Thus, in scenarios where continental  
171 ancestry was not provided, we inferred continental ancestry based on these other descriptors  
172 and categorized them into AFR, AMR, EAS, EUR, or SAS.

### 173 Statistical Analysis for Systematic Review

174 We visually examined LD structure of the reported SNPs across populations using  
175 LDBlockShow<sup>32</sup> and data from 1KGP on GRCh38<sup>27</sup>.  $R^2$  was calculated between functional  
176 variants and all reported tSNPs for each superpopulation. A tSNP was only included in our  
177 population-specific analysis if that tSNP was actually used to derive ABO blood types in an  
178 existing study including a population with similar ancestry. To examine within and across  
179 population variation of LD, we calculated  $r^2$  between all reported tSNPs and functional variants  
180 across the 26 subpopulations described in 1KGP. Values were then grouped by  
181 superpopulation to evaluate variation within and across superpopulations. The functional variant  
182 for O vs non-O alleles was defined as rs8176719 and the functional variants for A vs B alleles

183 were defined as rs7853989, rs8176743, rs8176746, and rs8176747. For our primary analyses,  
184 we calculated a single  $r^2$  value for each population in each study between the study's reported  
185 tSNP and the functional variant (rs8176719 for O vs non-O and rs8176746 for A vs B) using the  
186 matching 1KGP superpopulation. We first conducted a Kruskal Wallis test for differences in  
187 median  $r^2$  across superpopulations for each tSNP using R<sup>33</sup>. Then we performed pairwise  
188 comparisons across superpopulations for each tSNP with Dunn's test of multiple comparisons  
189 using rank sums. Our primary analysis excluded studies that used ABO allele-determining  
190 functional variants, however a secondary analysis was also performed that included studies  
191 using functional variants. We excluded a single study with inferred South Asian (SAS)  
192 continental ancestry due to the small sample size, restricting our inferred continental ancestries  
193 of interest to AFR, AMR, EAS and EUR. Studies that had populations with unclear ancestry  
194 were also excluded. We calculated the coefficient of variation for  $r^2$  to evaluate variance across  
195 superpopulations in a kernel density plot.

#### 196 *Derivation of Population and Data for All of Us Research Program Analysis*

197 To evaluate real-world consequences of utilizing tSNPs in place of functional variants or  
198 serology, we utilized a subset of AoURP<sup>28</sup>. The AoURP, sponsored by the National Institutes of  
199 Health (NIH), is a longitudinal cohort study with an aim to advance precision medicine by  
200 collecting electronic health records (EHR), participation-provided information (PPI), and  
201 genomic data for at least one million US residents. AoURP EHR short-read whole genome  
202 sequence (srWGS) data was accessed via the version 7 curated data repository (CDR v7)  
203 within the Controlled Tier. Participants that were included in this cohort were recruited between  
204 2018 and 2022. AoURP participants with both ABO blood types derived from serology and  
205 srWGS data were included in our analyses. Serology was obtained from the EHR domain "Labs  
206 & Measurements" under the logical observation identifiers names and codes (LOINC) code 882-  
207 1 (Abo and Rh group [Type] In Blood) and 883-9 (ABO group [Type] in Blood). For individuals



208 with multiple ABO serology results, we excluded any individuals whose ABO blood type differed  
209 upon repeat testing.

210 We used computed ancestry provided by the AoURP consortium based on srWGS<sup>34,35</sup>.  
211 The ancestry categories are based on those described in gnomAD<sup>36</sup>, Human Genome Diversity  
212 Project<sup>37</sup>, and 1KGP<sup>27</sup>: African (AFR), Latino/Native American/Admixed American (AMR), East  
213 Asian (EAS), European (EUR), Middle Eastern (MID), and South Asian (SAS). A random forest  
214 classifier was trained on a set of the HGDP and 1000 Genomes samples, and 16 principal  
215 components (PCs) of the training sample genotypes were generated. AoURP samples were  
216 projected into the PC analysis space of the training data, and the classifier was applied to  
217 determine ancestry.

#### 218 Derivation of ABO Blood Type and Alleles in the AoURP

219 srWGS was accessed in the Hail MatrixTable format from the v7 genomics CDR. We  
220 extracted SNPs of interest, including tSNPs utilized in existing studies and functional ABO  
221 variants from the AoURP curated subset files “srWGS: ACAF Threshold” that is comprised of  
222 srWGS SNP and insertion-deletion (indel) variants that are frequent in the AoURP computed  
223 ancestry subpopulations. Using SHAPEIT5<sup>38</sup>, we phased a ~1 million base pair locus that  
224 encompassed the *ABO* gene with the 1KGP phase three collection used as the reference.

225 ABO alleles were derived using functional variants and then tSNPs. For deriving ABO alleles  
226 from functional variants, we utilized a 2-SNP approach. Individuals were first assessed on  
227 whether they had O or non-O blood type alleles using the functional variant rs8176719 with T  
228 engendering O alleles and TC engendering non-O alleles. Those with non-O alleles were further  
229 assessed to determine if they had A or B alleles using the functional variant rs8176746 with G  
230 engendering A alleles and T engendering B alleles. Blood types were inferred based on whether  
231 an individual had the following alleles: O/O (O), A/O or A/A (A), B/O or B/B (B), A/B (AB).

232 We then derived ABO alleles using tSNPs from existing studies. We first derived only O vs  
233 non-O alleles using the O vs non-O tSNPs: rs505922 (C>T), rs657152 (A>C), rs8176704 (G>A),

234 rs687289 (A>G), rs612169 (G>A), rs529565 (C>T), rs8176693 (C>T), rs514659 (C>A), and  
235 rs8176645 (A>T). In each scenario the reference allele engendered the non-O allele, and the  
236 alternative allele engendered the O allele. Those with non-O/non-O or non-O/O alleles were  
237 considered to have a non-O blood type, and those with O/O alleles were considered to have an  
238 O blood type. To assess A vs B tSNPs, we utilized a 2-SNP approach. The functional variant  
239 rs8176719 was first used to determine O vs non-O, then A vs B alleles were derived using the A  
240 vs B tSNPs: rs8176749 (C>T), rs8176672 (C>T), rs8176741 (G>A), rs8176722 (C>A),  
241 rs8176720 (T>C). In each scenario the reference allele engendered the A allele and the  
242 alternative allele engendered the B allele. Blood types were subsequently determined using the  
243 alleles as previously described.

#### 244 Statistical Analysis for All of Us Research Program Cohort

245 LD between the functional variants and tSNPs was calculated using PLINK in the  
246 AoURP cohort overall (ALL) and in each ancestry-specific population (AMR, AFR, EUR, SAS,  
247 EAS, MID). Similarly, we calculated discordance between ABO blood types derived from  
248 functional variants versus tSNPs. Additionally, we calculated discordance between ABO blood  
249 types derived from SNPs (both functional variants and tSNPs), and those captured by serology.  
250 To evaluate the relationship between LD and discordance, we measured the relationship  
251 between the discordance observed between the O vs non-O functional variant and tSNPs, and  
252 the  $r^2$  calculated between the functional variant and tSNPs with Spearman's correlation. Data  
253 from the *All of Us* Research Program is accessible only through the Researcher Workbench  
254 (<https://workbench.researchallofus.org>) as stipulated in the informed consent of participants in  
255 the program. This data use agreement prohibits investigators from providing row level data on  
256 AllofUs participants and thus providing a de-identified dataset is not possible for this manuscript.  
257 The code used for this demonstration project is available within the Researcher Workbench.

258

## 259 **Results**

260 *Characteristics of the Studies for Systematic Review*

261 The initial search retrieved 2,693 publications from seven databases and resulted in 136  
262 publications that met criteria for inclusion in this review (**Figure 1; Table S6**). the mean and  
263 median year of publication were both 2016 (**Table 1; Figure S1**). Included studies were  
264 published in a variety of journals (**Table S7**) and focused on a wide variety of phenotypes with  
265 the majority of studies focused on hematological (n=28, 20.6%), cardiovascular (n=28, 20.6%),  
266 or oncology phenotypes (n=21, 15.4%) (**Figure S2**). The majority of platforms used fell under  
267 the genotyping category (n=72, 52.9%), followed by PCR/specific target (n=46, 33.8%),  
268 sequencing (n=5, 3.7%), and multiple platforms (n=13, 9.6%) (**Table 1; Figure S3**). A total of 56  
269 (41.2%) of the studies did not describe use of a haplotype analysis, 52 (38.2%) did describe a  
270 haplotype analysis, and it was unclear for 28 (20.6%) of the studies (**Table 1**). Most studies  
271 (n=100, 73.5%) were done in populations that would be described as a single population group,  
272 AFR (n=7), AMR (n=3), EAS (n=30), EUR (n=59), and SAS (n=1). A total of 17 (12.5%) of the  
273 studies were done in multiple populations and 19 (14.0%) of the studies had an unclear  
274 population breakdown (**Table 1; Table S8**). Regardless of whether the study was done in a  
275 single or multiple populations, most studies were done in EUR populations (n=74, 56.9%).

276 A total of 11 SNPs were used to determine O vs non-O blood type alleles and a total of 9  
277 SNPs were used to determine A vs B blood type alleles (**Figure S4**). Some studies used more  
278 than one SNP (n=9 [6.6%] to determine O vs non-O and n=20 [14.7%] to determine A vs B)  
279 while others used a single SNP (n=115 [84.6%] to determine O vs non-O and n=87 [64.0%] to  
280 determine A vs B) (**Table S9**). Out of the 136 studies, 67 (49.3%) used the functional variant  
281 (rs8176719) to determine the O blood type allele and 90 (66.2%) studies used at least one of  
282 the functional variants (rs7853989, rs8176743, rs8176746, rs8176747) to determine the A or B  
283 blood type allele.

284 *Linkage and Suitability Across Inferred Ancestry Groups for O vs non-O tSNPs Used by Studies*  
285 *in Systematic Review*

286 tSNPs used to determine the O allele were in highest LD with the functional variant in  
287 the EAS population with median  $r^2=0.95$  (range 0.39-1) (**Figure 2**). No tSNP was in perfect LD  
288 with the O allele functional variant rs8176719 across all populations. In the AFR population,  
289 tSNPs used in prior studies displayed extremely low LD with the functional variant with median  
290  $r^2=0.36$  (range 0.14-0.47) (**Figure 2B**). LDpop was unable to retrieve values for the tSNP  
291 rs72238104 used by one study in the EAS population<sup>39</sup>. We observed a wide range of LD  
292 between the reported tSNPs and the functional variant(s) across superpopulations, especially in  
293 the AFR group (**Figure 3**). All tSNPs had significantly different medians across  
294 superpopulations (**Table S10**). Most notably, for seven out of the nine total tSNPs, the AFR  
295 population exhibited significantly lower  $r^2$  values when compared to EAS and SAS populations  
296 (**Table S11**).

297 In the primary analysis for the O vs non-O SNPs, when a study used a tSNP we  
298 compared  $r^2$  values for the reported tSNPs to the functional variant rs8176719 using inferred  
299 ancestry groups tSNPs had median  $r^2=0.443$  (range 0.387-0.448) in AFR, median  $r^2=0.869$   
300 (range 0.853-0.975) in EUR, and median  $r^2=0.946$  (range 0.946-0.976) in EAS (**Figure 4A**). The  
301 single study that used a tSNP in an AMR population had  $r^2$  of 0.820. Tag SNPs used by studies  
302 had significantly lower  $r^2$  in AFR (median  $r^2=0.443$ ) than in EAS (median  $r^2=0.946$ ;  $p=1.1 \times 10^{-5}$ )  
303 and EUR (median  $r^2=0.869$ ;  $p=0.023$ ). We also observed that tSNPs performed worse in EUR  
304 (median  $r^2=0.869$ ) populations compared to EAS populations (median  $r^2=0.946$ ;  $p=1.6 \times 10^{-3}$ ).  
305 Other pairwise comparisons of median  $r^2$  between populations were not statistically significant  
306 (**Table S11**).

307 Linkage and suitability Across Inferred Ancestry Groups of A vs B tSNPs Used by Studies in  
308 Systematic Review

309 The four functional variants that differentiate between the A and B blood type alleles  
310 (rs7853989, rs8176743, rs8176746, rs8176747) were in very high LD with one another only in  
311 AFR, EAS, and SAS with range of  $r^2=0.96-1$  (**Figure S5**). In AMR and EUR, the functional

312 variant rs7853989 had lower LD with the other three functional variants with  $r^2=0.72$  in AMR and  
313  $r^2=0.71$  in EUR. In EAS, all the tSNPs were in high LD with one another with the exception of  
314 rs8176720, which was also in low LD with the other reported SNPs ( $r^2$  range 0.05-0.36 across  
315 all populations). Within and across superpopulations, we observed a wide range of LD between  
316 the reported tSNPs and the functional variant(s) (**Figures S5-S7**). Using rs8176746 as the A vs  
317 B representative functional variant, four (rs7853989, rs8176672, rs8176720, rs8176722) out of  
318 the seven tSNPs had significantly different medians across superpopulations (**Table S10**).  
319 Pairwise comparisons between superpopulations were further examined for these 4 tSNPs, but  
320 no one population consistently performed worse than the others (**Table S11**).

321 With respect to A vs B SNPs, the number of studies that used one of the functional  
322 variants (rs7853989, rs8176743, rs8176746, rs8176747) vs tSNPs were: AFR (78.6%; 21.4%),  
323 AMR (100%; 0%), EAS (92.9%; 7.1%), and EUR (75%, 25%). The two studies in AFR  
324 populations that used A vs B tSNPs both had  $r^2=1$  (**Figure 4B**). For studies in EAS populations,  
325 one study used a tSNP with  $r^2=0.9936$  and one with a  $r^2=0.2566$ . For studies using an EUR  
326 population, the  $r^2$  range was 0.1816-1 with a median of 1. No studies using an AMR population  
327 used a tSNP to infer A or B blood type alleles (**Figure 4B**). Pairwise comparisons of median  $r^2$   
328 between populations were not statistically significant (**Table S12**).

329 *Linkage and Suitability of tSNPs from Studies in Systematic Review, Evaluated in the All of Us*  
330 *Research Program*

331 A total of 10,771 individuals were identified with both srWGS and ABO blood type  
332 serology results in the AoURP, comprised of individuals with AFR (n=2,000; 18.6%), AMR  
333 (n=3,794; 35.2%), EAS (n=302; 2.8%), EUR (n=4,496; 41.7%), MID (n=47; 0.4%) and SAS  
334 (n=132; 1.2%) ancestry (**Table 2**). A majority of the cohort was female (n=7,774; 71.9%) and  
335 had a mean age of 53. Nearly half of the cohort had the O blood type (n=5,274; 49.0%) with the  
336 O blood type being most prevalent in individuals with AFR and AMR ancestry (n=1,004; 50.2%  
337 and n=2,179; 57.4%).

338 The median  $r^2$  for O vs non-O tSNPs (n=9) versus the functional variant was  $r^2=0.75$   
339 (range 0.18-0.83) in the complete cohort (ALL) (**Figure S8**). Compared to the other ancestry  
340 groups, all the tSNPs were observed to have very low LD in the AFR ancestry group with  
341 median  $r^2=0.44$  (range 0.13-0.56). LD was consistently low across all ancestry groups for  
342 rs8176704 with median  $r^2=0.12$  (range 0.001-0.13) and rs8176693 with median  $r^2=0.19$  (range  
343 0.14-0.39). The median  $r^2$  for A vs B tSNPs (n=5) versus the functional variant was  $r^2=0.84$   
344 (range 0.15-0.998) in ALL. LD was consistently low across all ancestry groups for rs8176720  
345 with median  $r^2=0.194$  (range 0.076-0.305). Heatmaps of discordance between blood types  
346 derived from functional variants versus tSNPs are provided in the **Supplementary Figures S9**  
347 and **S10**.

#### 348 Performance of Genotype-Derived ABO Blood Types in the AoURP

349 We assessed discordance between O and non-O blood types derived from the functional  
350 variant rs8176719 and tSNPs, and those derived from serology in the complete cohort and  
351 across ancestry groups (**Figure 5A**). The tSNPs rs8176704 and rs8176693 displayed the most  
352 discordance across all ancestry groups with a median of 0.43 (range 0.38-0.58) and 0.46 (range  
353 0.40-0.58) respectively. Compared to the other ancestry groups, discordance was particularly  
354 high across all SNPs in AFR with a median of 0.19 (range 0.01-0.51). In almost all cases, O and  
355 non-O blood types derived from the functional variant observed less discordance with serology  
356 than O and non-O blood types derived from tSNPs. In 10 cases, the tSNPs observed less  
357 discordance than the functional variant: rs505922 in EUR and SAS, rs687289 in EUR and SAS,  
358 rs612169 in EUR and SAS, rs529565 in EUR and SAS, and rs514659 in EUR and SAS. The  
359 majority of the discordance observed in these case occurred in the same 120 EUR participants  
360 and  $\leq 20$  EAS participants across the tSNPs. Additionally, LD ( $r^2$ ) significantly correlated with  
361 discordance with Spearman's  $\rho=-0.90$  and p-value= $3.08 \times 10^{-23}$  (**Figure 5B**).

362

363 **Discussion**

364 In the absence of serology, ABO blood types and alleles are often determined using  
365 genomic variants and frequently derived in the pursuit of investigating associations or risk with  
366 cardiovascular disease<sup>9,40-42</sup>. Here we present the results of a systematic review and analysis  
367 that aimed to understand if studies are using appropriate tSNPs for their population to determine  
368 ABO alleles, and if tSNPs are transferable across different populations. We found that many  
369 tSNPs used to differentiate between O vs non-O alleles had low  $r^2$  with the functional variant,  
370 particularly for underrepresented populations such as AFR and AMR populations. This non-  
371 transferability of O vs non-O tSNPs was further exemplified by the disparate LD structures we  
372 observed in the ABO gene across continental populations. Not only did we observe highly  
373 variable LD structure for reported SNPs across continental populations, but we also observed a  
374 wide range of linkage between the reported tSNPs and the functional variant(s) within  
375 populations. Furthermore, in a large and diverse cohort from AoURP, we found that O and non-  
376 O blood types derived from tSNPs had generally high discordance with serology, particularly in  
377 the population with African ancestry. The observed discordance was highly inversely correlated  
378 with LD.

379 The lack of diversity in genetic research has been well cited<sup>2,28,43-45</sup>, and the issue is  
380 compounded when findings done in one population are erroneously assumed to translate  
381 directly to another population<sup>46-48</sup>. Genetic studies have been disproportionately performed in  
382 cohorts of European ancestry with low representation of AFR and AMR individuals<sup>43,46</sup> and our  
383 systematic review reflects this trend. Despite the research bias towards European populations,  
384 our study shows that ABO tSNPs generally performed the best in EAS populations. This likely  
385 reflects the early ABO genetic research performed primarily in Japanese cohorts<sup>14,49</sup>.  
386 Interestingly, we observed reductions in LD and blood group accuracy for tSNPs in EUR  
387 compared to EAS populations. Our results suggest that many of the tSNPs that were originally  
388 identified in EAS populations by early ABO researchers have been used without appropriate  
389 vetting in more diverse populations.



390 Acknowledging that tSNPs are not always transferable across populations also has  
391 broad implications for genomic research, which claims to be making efforts towards increasing  
392 cohort diversity<sup>50</sup>. While many studies established a tSNP linkage threshold of  $r^2 \geq 0.8$ <sup>4,51,52</sup>, often  
393 for genotyping and array purposes<sup>53-55</sup>, other studies acknowledge that the most conservative  
394 approach to selecting tSNPs is to select tSNPs that are a perfect proxy ( $r^2=1.0$ ) for the SNP of  
395 interest<sup>52</sup>. Additionally, discordance of ABO blood alleles derived from functional variants and  
396 tSNPs increases linearly as LD decreases in a diverse population, with a clear delineation  
397 observed at  $r^2=0.9$ . Our results suggest that a conservative and very high linkage ( $r^2>0.9$ )  
398 threshold is needed to maintain blood type accuracy in the population of interest. As seen in this  
399 study, tSNPs used for inferring O vs non-O alleles are not transferable across populations  
400 particularly in AFR and AMR populations. Even within superpopulations (AFR, AMR, EAS,  
401 EUR), tSNPs exhibit wildly varied linkage. A more rigorous approach would be to forgo the use  
402 of tSNPs and instead use functional variants, although we recognize that many genotyping  
403 methods cannot capture indels, such as the functional variant that differentiates between O vs  
404 non-O blood type alleles (rs8176719). Imputation of indels may be unreliable in some  
405 populations since accuracy is dependent on the matching of LD structure between a cohort of  
406 interest and a reference population<sup>56</sup>. In many cases, no appropriate reference population or  
407 very small reference populations are available for underrepresented continental ancestry  
408 groups, and this may lead to reduced imputation accuracy<sup>57-59</sup>. Furthermore, many programs for  
409 phasing and imputation are not able to handle indels<sup>60,61</sup>.

410 To evaluate the real-world consequences of utilizing tSNPs in place of functional  
411 variants, we utilized a large and diverse subset of the AoURP<sup>28</sup> cohort to observe discordance  
412 between ABO blood types derived from functional variants, tSNPs, and serology. Discordance  
413 was generally high between O and non-O blood types derived from the functional variant and  
414 those derived from serology in participants with AFR ancestry. This finding was unsurprising as  
415 LD calculated between the functional variant and tSNPs in AFR populations from 1KGP and



416 AoURP were consistently low. Using tSNPs to derive ABO blood groups would have an  
417 increased likelihood of being inaccurate in under-represented populations such as those with  
418 African ancestry. Our data indicates that, depending on the tSNP used to derive O vs non-O  
419 blood types and the population of interest, as many as 58 out of a 100 people could be  
420 mistyped. Previously observed associations in ABO and the corresponding conclusions based  
421 on these potentially inaccurate blood types are likely to further exacerbate the already prevalent  
422 health disparities in genomic research.

423 We also observed inconsistent and inadequate documentation provided by publications.  
424 Very few studies described their population in terms of continental genetic ancestry and instead  
425 used only racial or ethnic terms which makes evaluating the appropriateness of a tSNP  
426 challenging. For a large portion of the studies, it was unclear whether the study conducted a  
427 haplotype analysis. This is relevant because, to determine ABO alleles, phased data and a  
428 haplotype analysis must be performed. Alarming, we were able to confirm that only 38.2% of  
429 the studies conducted a phasing or haplotype analysis, the lack of which would likely result in  
430 reduced accuracy of ABO blood group assignment.

431 This study has several limitations worthy of mention. Many studies only described their  
432 populations using racial or ethnic terms, and we were forced to infer continental genetic  
433 ancestry based off this poor proxy. We acknowledge the limitations of this approach and that,  
434 while categories such as race and ethnicity have historically been used as proxies for genetic  
435 ancestry due to positive correlation, race and ethnicity are socially-constructed concepts that  
436 should not be conflated with the biologically based groupings derived from genetic ancestry<sup>62</sup>.  
437 Similarly, even the populations described by the most diverse publicly available dataset, the  
438 1KGP<sup>27</sup>, did not describe an appropriate continental ancestry population associated with Middle  
439 Eastern individuals. This reflects a larger issue that much work is needed to establish reference  
440 files that are more comprehensive and global. Secondly, some studies used more than one  
441 SNP to determine O vs non-O or A vs B blood type alleles but did not describe in which

442 scenario each SNP was used. Thus, we were compelled to select the best performing SNP and  
443 our resulting analyses may reflect more optimistic results than the reality. In the systematic  
444 review portion of this study, we were not able to identify individuals that overlapped in multiple  
445 studies and adjust this total count in our analyses. Lastly, we were unable to account for  
446 complex haplotypes, rare O-determining variants, or non-ABO variation conferring changes in  
447 blood type serology.<sup>63-65</sup> For instance, individuals of the Bombay and para-Bombay phenotypes  
448 appear to have functional A and B ABO alleles, but lack functional alleles in FUT1 and FUT2,  
449 which encode precursor substrates for A and B transferases. Consequently, we are unable to  
450 evaluate whether the few instances where blood types derived from tSNPs displayed less  
451 discordance with serology than with blood types derived from the functional variant was due to  
452 inaccuracies from serological typing, problems with sequence accuracy known to be associated  
453 with indels<sup>66,67</sup>, or rare functional variation in ABO or related genes.

454

## 455 **Conclusion**

456 ABO blood types have widespread clinical use and are robustly associated with  
457 cardiovascular disease. Many studies opted to use functional variants to determine ABO blood  
458 alleles, however, as observed in this study, there is potential for misinference of ABO blood  
459 types due to using inappropriate tSNPs thus potentially leading to erroneous conclusions. We  
460 observed that LD structure among tSNPs used in studies to infer ABO alleles varied  
461 substantially across populations. Even within superpopulations (AFR, AMR, EAS, EUR, SAS),  
462 linkage between a tSNP and a functional variant varied widely. Many studies that used tSNPs  
463 for determining O vs non-O alleles that had low  $r^2$  particularly in AFR and AMR populations.  
464 Furthermore, high discordance was observed between O and non-O blood types derived from  
465 tSNPs versus serology, particularly in the AFR population from AoURP. Our results not only  
466 have important implications for how ABO alleles are inferred from genomic data, but also  
467 highlight that tSNPs are not always transferable across continental populations and may result

468 in furthering the genomic research and health disparities<sup>45</sup> already seen in underrepresented  
469 populations.

470

#### 471 **Availability of data and materials**

472 Data from the *All of Us* Research Program is accessible only through the Researcher  
473 Workbench ([https://workbench.researchallofus.org/workspaces/aou-rw-](https://workbench.researchallofus.org/workspaces/aou-rw-a90a6fe4/duplicateofabophewas)  
474 [a90a6fe4/duplicateofabophewas](https://workbench.researchallofus.org/workspaces/aou-rw-a90a6fe4/duplicateofabophewas)) as stipulated in the informed consent of participants in the  
475 program. This data use agreement prohibits investigators from providing row level data on *All of*  
476 *Us* participants and thus providing a de-identified dataset is not possible for this manuscript. The  
477 code used for this demonstration project is available within the Researcher Workbench.  
478 Datasets not generated from the *All of Us* Research Program and the associated code are  
479 available on GitHub ([https://github.com/Karnes-Lab/ABO\\_systematic\\_review](https://github.com/Karnes-Lab/ABO_systematic_review)).

480

#### 481 **Acknowledgements**

482 The authors would like to thank the participants of the *All of Us* Research Program. Research  
483 reported in this publication was supported by the National Institutes of Health's National Heart,  
484 Lung, and Blood Institute (grants R01 HL156993, R01 HL158686, R21HL172036) and the  
485 Office of the Director (grant OT2OD036485).

486

#### 487 **Author contributions**

488 Conceived the study, J.H.K., K.L.M., J.B.G, J.R.M.; databases searches for systematic review,  
489 J.R.M., K.L.M.; data curation for systematic review, K.L.M., C.U.S., M.L.B, K.B., G.Q., J.F.; data  
490 analysis, K.L.M., A.K.; analysis support, C.U.S.; visualization, K.L.M., A.K., wrote the paper,  
491 K.L.M, J.H.K., A.K., with input from all authors.

492

#### 493 **Declaration of interests**

494 The authors declare no competing interests.

495

## 496 **References**

- 497 1. Popejoy AB, Crooks KR, Fullerton SM, et al. Clinical Genetics Lacks Standard  
498 Definitions and Protocols for the Collection and Use of Diversity Measures. *Am J Hum Genet.*  
499 Jul 2 2020;107(1):72-82. doi:10.1016/j.ajhg.2020.05.005
- 500 2. Popejoy AB, Fullerton SM. Genomics is failing on diversity. *Nature.* 2016;538(7624):161-  
501 164. doi:10.1038/538161a
- 502 3. Cousin E, Genin E, Mace S, et al. Association studies in candidate genes: strategies to  
503 select SNPs to be tested. *Hum Hered.* 2003;56(4):151-9. doi:10.1159/000073200
- 504 4. Altshuler D, de Bakker PIW, Burtt NP, et al. Transferability of tag SNPs in genetic  
505 association studies in multiple populations. *Nature genetics.* 2006;38(11):1298-1303.  
506 doi:10.1038/ng1899
- 507 5. Grundbacher FJ. The Etiology of ABO Hemolytic Disease of the Newborn. *Transfusion*  
508 (*Philadelphia, Pa*). 1980;20(5):563-568. doi:10.1046/j.1537-2995.1980.20581034512.x
- 509 6. Welsby IJ, Phillips-Bute B, Mathew JP, et al. ABO blood group influences transfusion  
510 and survival after cardiac surgery. *Journal of thrombosis and thrombolysis.* 2014;38(3):402-408.  
511 doi:10.1007/s11239-013-1045-2
- 512 7. Sazama K. Reports of 355 transfusion-associated deaths: 1976 through 1985.  
513 *Transfusion (Philadelphia, Pa)*. 1990;30(7):583-590. doi:10.1046/j.1537-  
514 2995.1990.30790385515.x
- 515 8. Mugabe B, Thomas D, Bolton-Maggs P, Cohen H. Serious Hazards of Transfusion  
516 (SHOT): Its Implications for Intensive Care. *Journal of the Intensive Care Society.*  
517 2013;14(3):215-219. doi:10.1177/175114371301400308

- 518 9. Groot HE, Villegas Sierra LE, Said MA, Lipsic E, Karper JC, van der Harst P. Genetically  
519 Determined ABO Blood Group and its Associations With Health and Disease. *Arteriosclerosis,*  
520 *thrombosis, and vascular biology*. 2020;40(3):830-838. doi:10.1161/atvbaha.119.313658
- 521 10. Chen Z, Yang S-H, Xu H, Li J-J. ABO blood group system and the coronary artery  
522 disease: an updated systematic review and meta-analysis. *Scientific Reports*. 2016/03/18  
523 2016;6(1):23250. doi:10.1038/srep23250
- 524 11. Vasan SK, Rostgaard K, Majeed A, et al. ABO Blood Group and Risk of  
525 Thromboembolic and Arterial Disease: A Study of 1.5 Million Blood Donors. *Circulation*. Apr 12  
526 2016;133(15):1449-57; discussion 1457. doi:10.1161/circulationaha.115.017563
- 527 12. Abegaz SB. Human ABO Blood Groups and Their Associations with Different Diseases.  
528 *BioMed research international*. 2021;2021:6629060-6629060. doi:10.1155/2021/6629060
- 529 13. Ward SE, O'Sullivan JM, O'Donnell JS. The relationship between ABO blood group, von  
530 Willebrand factor, and primary hemostasis. *Blood*. 2020;136(25):2864-2874.  
531 doi:10.1182/blood.2020005843
- 532 14. Yamamoto F-i, Clausen H, White T, Marken J, Hakomori S-i. Molecular genetic basis of  
533 the histo-blood group ABO system. *Nature (London)*. 1990;345(6272):229-233.  
534 doi:10.1038/345229a0
- 535 15. Yamamoto F-i, McNeill PD, Hakomori S-i. Genomic organization of human histo-blood  
536 group ABO genes. *Glycobiology (Oxford)*. 1995;5(1):51-58. doi:10.1093/glycob/5.1.51
- 537 16. Carlton VEH, Ireland JS, Useche F, Faham M. Functional single nucleotide  
538 polymorphism-based association studies. *Human Genomics*. 2006;2(6):391-402.  
539 doi:10.1186/1479-7364-2-6-391
- 540 17. Lee SH, Park G, Yang YG, Lee SG, Kim SW. Rapid ABO genotyping using whole blood  
541 without DNA purification. *Korean J Lab Med*. Jun 2009;29(3):231-7.  
542 doi:10.3343/kjlm.2009.29.3.231

- 543 18. Seltsam A, Doescher A. Sequence-Based Typing of Human Blood Groups. *Transfusion*  
544 *medicine and hemotherapy*. 2009;36(3):204-212. doi:10.1159/000217322
- 545 19. Gorakshakar A, Gogri H, Ghosh K. Evolution of technology for molecular genotyping in  
546 blood group systems. *Indian J Med Res*. Sep 2017;146(3):305-315.  
547 doi:10.4103/ijmr.IJMR\_914\_16
- 548 20. Ni X, Bai C, Nie C, et al. Identification and replication of novel genetic variants of ABO  
549 gene to reduce the incidence of diseases and promote longevity by modulating lipid  
550 homeostasis. *Aging (Albany NY)*. Nov 22 2021;13(22):24655-24674.  
551 doi:10.18632/aging.203700
- 552 21. Melzer D, Perry JRB, Hernandez D, et al. A genome-wide association study identifies  
553 protein quantitative trait loci (pQTLs). *PLoS genetics*. 2008;4(5):e1000072-e1000072.  
554 doi:10.1371/journal.pgen.1000072
- 555 22. Greer JB, Larusch J, Brand RE, O'Connell MR, Yadav D, Whitcomb DC. ABO blood  
556 group and chronic pancreatitis risk in the NAPS2 cohort. *Pancreas*. 2011;40(8):1188-1194.  
557 doi:10.1097/MPA.0b013e3182232975
- 558 23. Ohira T, Cushman M, Tsai MY, et al. ABO blood group, other risk factors and incidence  
559 of venous thromboembolism: the Longitudinal Investigation of Thromboembolism Etiology  
560 (LITE). *Journal of thrombosis and haemostasis*. 2007;5(7):1455-1461. doi:10.1111/j.1538-  
561 7836.2007.02579.x
- 562 24. Song J, Chen F, Campos M, et al. Quantitative influence of ABO blood groups on factor  
563 VIII and its ratio to von willebrand factor, novel observations from an ARIC study of 11,673  
564 subjects. *PLoS one*. 2015;10(8):e0132626-e0132626. doi:10.1371/journal.pone.0132626
- 565 25. Zakai NA, Judd SE, Alexander K, et al. ABO blood type and stroke risk: The RE asons  
566 for Geographic and Racial Differences in Stroke Study. *Journal of Thrombosis and*  
567 *Haemostasis*. 2014;12(4):564-570.

- 568 26. Stram DO. Tag SNP selection for association studies. *Genetic epidemiology*.  
569 2004;27(4):365-374. doi:10.1002/gepi.20028
- 570 27. Altshuler DM, Albers CA, Abecasis GR, et al. A global reference for human genetic  
571 variation. *Nature (London)*. 2015;526(7571):68-74. doi:10.1038/nature15393
- 572 28. Denny JC, Rutter JL, Goldstein DB, et al. The “All of Us” Research Program. *The New*  
573 *England journal of medicine*. 2019;381(7):668-676. doi:10.1056/NEJMSr1809937
- 574 29. Page MJ, McKenzie JE, Bossuyt PM, et al. The PRISMA 2020 statement: an updated  
575 guideline for reporting systematic reviews. *BMJ (Online)*. 2021;372doi:10.1136/bmj.n71
- 576 30. Machiela MJ, Chanock SJ. LDlink: A web-based application for exploring population-  
577 specific haplotype structure and linking correlated alleles of possible functional variants.  
578 *Bioinformatics*. 2015;31(21):3555-3557. doi:10.1093/bioinformatics/btv402
- 579 31. Alexander TA, Machiela MJ. LDpop: an interactive online tool to calculate and visualize  
580 geographic LD patterns. *BMC bioinformatics*. 2020;21(1):14-14. doi:10.1186/s12859-020-3340-  
581 1
- 582 32. Dong S-S, He W-M, Ji J-J, Zhang C, Guo Y, Yang T-L. LDBlockShow: a fast and  
583 convenient tool for visualizing linkage disequilibrium and haplotype blocks based on variant call  
584 format files. *Briefings in bioinformatics*. 2021;22(4)doi:10.1093/bib/bbaa227
- 585 33. *R: A Language and Environment for Statistical Computing* 2023. [https://www.R-](https://www.R-project.org)  
586 [project.org](https://www.R-project.org)
- 587 34. Program AoUR. *Genomic Research Data Quality Report: All of Us Curated Data*  
588 *Repository (CDR) release C2022Q4R9*. 2023. [https://support.researchallofus.org/hc/en-](https://support.researchallofus.org/hc/en-us/articles/4617899955092)  
589 [us/articles/4617899955092](https://support.researchallofus.org/hc/en-us/articles/4617899955092)
- 590 35. Wang X, Ryu J, Kim J, et al. Common and rare variants associated with cardiometabolic  
591 traits across 98,622 whole-genome sequences in the All of Us research program. *Journal of*  
592 *human genetics*. 2023;68(8):565-570. doi:10.1038/s10038-023-01147-z

- 593 36. Karczewski KJ, Cummings BB, Laricchia KM, et al. The mutational constraint spectrum  
594 quantified from variation in 141,456 humans. *Nature (London)*. 2020;581(7809):434-443.  
595 doi:10.1038/s41586-020-2308-7
- 596 37. Cavalli-Sforza LL. The Human Genome Diversity Project: past, present and future.  
597 *Nature Reviews Genetics*. 2005;6(4):333-340. doi:10.1038/nrg1596
- 598 38. Hofmeister RJ, Ribeiro DM, Rubinacci S, Delaneau O. Accurate rare variant phasing of  
599 whole-genome and whole-exome sequencing data in the UK Biobank. *Nature genetics*.  
600 2023;55(7):1243-1249. doi:10.1038/s41588-023-01415-w
- 601 39. Masuda M, Okuda K, Ikeda DD, Hishigaki H, Fujiwara T. Interaction of genetic markers  
602 associated with serum alkaline phosphatase levels in the Japanese population. *Hum Genome*  
603 *Var*. 2015;2:15019. doi:10.1038/hgv.2015.19
- 604 40. Bruzelius M, Strawbridge RJ, Trégouët D-A, et al. Influence of coronary artery disease-  
605 associated genetic variants on risk of venous thromboembolism. *Thrombosis research*.  
606 2014;134(2):426-432.
- 607 41. Li S, Schooling CM. A phenome-wide association study of ABO blood groups. *BMC*  
608 *Medicine*. 2020/11/17 2020;18(1):334. doi:10.1186/s12916-020-01795-4
- 609 42. Zakai NA, Judd SE, Alexander K, et al. ABO blood type and stroke risk: the REasons for  
610 Geographic And Racial Differences in Stroke Study. *Journal of thrombosis and haemostasis*.  
611 2014;12(4):564-570. doi:10.1111/jth.12507
- 612 43. Need AC, Goldstein DB. Next generation disparities in human genomics: concerns and  
613 remedies. *Trends in genetics*. 2009;25(11):489-494. doi:10.1016/j.tig.2009.09.012
- 614 44. Bustamante CD, De La Vega FM, Burchard EG. Genomics for the world. *Nature*  
615 *(London)*. 2011;475(7355):163-165. doi:10.1038/475163a
- 616 45. Landry LG, Ali N, Williams DR, Rehm HL, Bonham VL. Lack of diversity in genomic  
617 databases is a barrier to translating precision medicine research into practice. *Health Affairs*.  
618 2018;37(5):780-785. doi:10.1377/hlthaff.2017.1595



- 619 46. Martin AR, Kanai M, Kamatani Y, Okada Y, Neale BM, Daly MJ. Clinical use of current  
620 polygenic risk scores may exacerbate health disparities. *Nature genetics*. 2019;51(4):584-591.  
621 doi:10.1038/s41588-019-0379-x
- 622 47. Carlson CS, Matise TC, North KE, et al. Generalization and Dilution of Association  
623 Results from European GWAS in Populations of Non-European Ancestry: The PAGE Study.  
624 *PLoS Biology*. 2013;11(9):e1001661-e1001661. doi:10.1371/journal.pbio.1001661
- 625 48. Duncan L, Shen H, Gelaye B, et al. Analysis of polygenic risk score usage and  
626 performance in diverse human populations. *Nature communications*. 2019;10(1):3328-9.  
627 doi:10.1038/s41467-019-11112-0
- 628 49. Yamamoto F. A historical overview of advances in molecular genetic/genomic studies of  
629 the ABO blood group system. *Glycoconjugate Journal*. 2021:1-12.
- 630 50. Green ED, Gunter C, Biesecker LG, et al. Strategic vision for improving human health at  
631 The Forefront of Genomics. *Nature (London)*. 2020;586(7831):683-692. doi:10.1038/s41586-  
632 020-2817-4
- 633 51. Verlouw JAM, Clemens E, de Vries JH, et al. A comparison of genotyping arrays.  
634 *European journal of human genetics : EJHG*. 2021;29(11):1611-1624. doi:10.1038/s41431-021-  
635 00917-7
- 636 52. Daly MJ, Altshuler D, de Bakker PIW, Yelensky R, Pe'er I, Gabriel SB. Efficiency and  
637 power in genetic association studies. *Nature genetics*. 2005;37(11):1217-1223.  
638 doi:10.1038/ng1669
- 639 53. Hudson TJ, Lander ES, Schaffner SF, Daly MJ, Rioux JD. High-resolution haplotype  
640 structure in the human genome. *Nature genetics*. 2001;29(2):229-232. doi:10.1038/ng1001-229
- 641 54. Gabriel SB, Schaffner SF, Nguyen H, et al. The Structure of Haplotype Blocks in the  
642 Human Genome. *Science (American Association for the Advancement of Science)*.  
643 2002;296(5576):2225-2229. doi:10.1126/science.1069424

- 644 55. Patil N, Berno AJ, Hinds DA, et al. Blocks of Limited Haplotype Diversity Revealed by  
645 High-Resolution Scanning of Human Chromosome 21. *Science (American Association for the*  
646 *Advancement of Science)*. 2001;294(5547):1719-1723. doi:10.1126/science.1065573
- 647 56. Li Y, Willer C, Sanna S, Abecasis G. Genotype imputation. *Annu Rev Genomics Hum*  
648 *Genet.* 2009;10:387-406. doi:10.1146/annurev.genom.9.081307.164242
- 649 57. Schurz H, Müller SJ, Van Helden PD, et al. Evaluating the accuracy of imputation  
650 methods in a five-way admixed population. *Frontiers in genetics*. 2019;10:34-34.  
651 doi:10.3389/fgene.2019.00034
- 652 58. Nelson SC, Doheny KF, Pugh EW, et al. Imputation-based genomic coverage  
653 assessments of current human genotyping arrays. *G3 (Bethesda)*. Oct 3 2013;3(10):1795-807.  
654 doi:10.1534/g3.113.007161
- 655 59. Peterson RE, Kuchenbaecker K, Walters RK, et al. Genome-wide Association Studies in  
656 Ancestrally Diverse Populations: Opportunities, Methods, Pitfalls, and Recommendations. *Cell*.  
657 2019;179(3):589-603. doi:10.1016/j.cell.2019.08.051
- 658 60. Fuchsberger C, Abecasis GR, Hinds DA. Minimac2: Faster genotype imputation.  
659 *Bioinformatics*. 2015;31(5):782-784. doi:10.1093/bioinformatics/btu704
- 660 61. Das S, Forer L, Schönherr S, et al. Next-generation genotype imputation service and  
661 methods. *Nature genetics*. 2016;48(10):1284-1287. doi:10.1038/ng.3656
- 662 62. Fuentes A, Ackermann RR, Athreya S, et al. AAPA Statement on Race and Racism.  
663 *American journal of physical anthropology*. 2019;169(3):400-402. doi:10.1002/ajpa.23882
- 664 63. Chopra G, Kataria M, Batra A, kaur G, Kumar R. Detection of a weaker subgroup of A in  
665 ABO blood group system. *Asian journal of transfusion science*. 2022;16(1):132-134.  
666 doi:10.4103/ajts.ajts\_66\_21
- 667 64. Mizuno N, Ohmori T, Sekiguchi K, et al. Alleles Responsible for ABO Phenotype-  
668 Genotype Discrepancy and Alleles in Individuals with a Weak Expression of A or B Antigens.  
669 *Journal of forensic sciences*. 2004;49(1):1-8. doi:10.1520/jfs2003073

670 65. Poskitt TR, Fortwengler Jr HP. A Study of Weak Subgroups of Blood Group A with an  
671 Antiglobulin-Latex Test. *Transfusion (Philadelphia, Pa)*. 1974;14(2):158-166.

672 doi:10.1111/j.1537-2995.1974.tb04510.x

673 66. Narzisi G, Schatz MC. The challenge of small-scale repeats for indel discovery. *Frontiers*  
674 *in bioengineering and biotechnology*. 2015;3:8-8. doi:10.3389/fbioe.2015.00008

675 67. Fang H, Wu Y, Narzisi G, et al. Reducing INDEL calling errors in whole genome and  
676 exome sequencing data. *Genome medicine*. 2014;6(10):89-89. doi:10.1186/s13073-014-0089-z

677

## 678 **Figure descriptions**

679

680 **Figure 1. Study selection process per PRISMA 2020 guidelines.**

681

682 **Figure 2. LD heatmap for SNPs that differentiate O vs non-O alleles across 1000**

683 **Genomes Project-defined superpopulations.** This figure represents a 16.59 kb region of the

684 ABO gene starting at 133.258 Mb and ending at 133.274 Mb. This region encompasses the

685 locations of the O vs non-O functional variant and tag SNPs. The blue block represents the

686 noncoding regions and the pink lines represent exons. The functional variant is highlighted in

687 red. Linkage disequilibrium blocks representing the  $r^2$  values of the O vs non-O functional variant

688 and tSNPs are shown beneath the section of the ABO gene. Lighter color blocks represent

689 lower  $r^2$  values. **A)** Represents  $r^2$  values across all continental populations. **B) - F)** Represents  $r^2$

690 values across specific continental populations. AFR: African ancestry, AMR: Admixed American

691 ancestry, EAS: East Asian ancestry, EUR: European ancestry, SAS: South Asian ancestry.

692

693 **Figure 3. Linkage disequilibrium of O versus non-O tSNPs with functional variants across**

694 **inferred continental ancestry groups. A)**  $r^2$  between O vs non-O functional variant

695 (rs8176719) and tag SNPs calculated across subpopulations and plotted per superpopulation  
696 (AFR: African ancestry, AMR: Admixed American ancestry, EAS: East Asian ancestry, EUR:  
697 European ancestry, SAS: South Asian ancestry). **B)** The coefficient of variation for  $r^2$  between  
698 the O vs non-O functional variant (rs8176719) and tSNPs calculated for each subpopulation  
699 population and plotted as a kernel density estimate plot across superpopulations.

700

701 **Figure 4. Linkage disequilibrium between tSNPs and functional variants for O vs. non-O**  
702 **(A) and A vs. B (B) by inferred continental ancestries for each study.**  $r^2$  was calculated for  
703 each SNP used to determine ABO alleles for each study included in this systematic review that  
704 used a tSNP.  $r^2$  was calculated using the reference population (AFR: African ancestry, AMR:  
705 Admixed American ancestry, EAS: East Asian ancestry, EUR: European ancestry) that best  
706 matched the populations used by each study. If a study used more than one population, then  
707 that study is included more than once as each population may have a different  $r^2$  value. For  
708 studies using more than one SNP for a specific population, we assumed they were using the  
709 SNP with the highest  $r^2$  value for their population. **A)** rs8176719 was the functional variant used  
710 to calculate  $r^2$  which differentiates O vs non-O alleles and **B)** rs8176746 was selected as the  
711 representative functional variant which differentiates A vs B alleles and was used to calculate  $r^2$ .  
712 No studies using an AMR population used a tSNP to derive A vs B blood type alleles.

713

714 **Figure 5. Discordance between O vs non-O blood types from tSNPs and serology. A)**  
715 Discordance between ABO O and non-O blood types derived from the O vs non-O functional  
716 variant (rs8176719) and tSNPs and those derived from serology are displayed as a heatmap.  
717 Discordance (proportion of non-matches in a cohort of 10,771) was calculated across all  
718 ancestry groups (ALL) and calculated for each inferred continental ancestry group separately  
719 (AFR: African ancestry, AMR: Admixed American ancestry, EAS: East Asian ancestry, EUR:  
720 European ancestry, MID: Middle Eastern ancestry, SAS: South Asian ancestry). **B)** Discordance

721 between blood types derived from O vs non-O tSNPs and those derived from serology was  
 722 plotted along with LD ( $r^2$ ) between the O vs non-O functional variant and tSNPs. A Spearman's  
 723 correlation coefficient was calculated (-0.90, p-value =  $1.51 \times 10^{-38}$ ).

724 **Tables**

725

Table 1. Summary of characteristics of systematic review studies.

|                                              | AFR      | AMR       | EAS       | EUR       | SAS       | Multiple  | Unclear  |
|----------------------------------------------|----------|-----------|-----------|-----------|-----------|-----------|----------|
| <b>Total studies, n</b>                      | 7        | 3         | 30        | 59        | 1         | 17        | 19       |
| <b>Total participants, n*</b>                | 11096    | 2173      | 215613    | 1139015   | 646       | 1643744   | 1089870  |
| <b>Mean Year of Study</b>                    | 2015     | 2015      | 2016      | 2016      | 2021      | 2016      | 2017     |
| <b>Sequencing/genotyping platform, n (%)</b> |          |           |           |           |           |           |          |
| sequencing                                   | 2 (28.6) | 0 (0)     | 0 (0)     | 1 (1.7)   | 0 (0)     | 0 (0)     | 2 (10.5) |
| genotyping                                   | 4 (57.1) | 0 (0)     | 12 (40.0) | 36 (61.0) | 1 (100.0) | 10 (58.8) | 9 (47.4) |
| PCR/specific target                          | 1 (14.3) | 3 (100.0) | 14 (46.7) | 17 (28.8) | 0 (0)     | 5 (29.4)  | 6 (31.6) |
| multiple platforms                           | 0 (0)    | 0 (0)     | 4 (13.3)  | 5 (8.5)   | 0 (0)     | 2 (11.8)  | 2 (10.5) |
| <b>Performed haplotype analysis, n (%)</b>   |          |           |           |           |           |           |          |
| yes                                          | 4 (57.1) | 1 (33.3)  | 5 (16.7)  | 27 (45.8) | 1 (100.0) | 10 (58.8) | 4 (21.2) |
| no                                           | 2 (28.6) | 2 (66.7)  | 19 (63.3) | 21 (35.6) | 0 (0)     | 3 (17.6)  | 9 (47.4) |
| unclear                                      | 1 (14.3) | 0 (0)     | 6 (20.0)  | 11 (18.6) | 0 (0)     | 4 (23.5)  | 6 (31.6) |

Each study is categorized as having participants from only one of the inferred continental ancestry groups (AFR: African ancestry, AMR: Admixed American ancestry, EAS: East Asian ancestry, EUR: European ancestry, SAS: South Asian ancestry) or having participants from multiple inferred continental ancestry groups (Multiple) or it was unclear which group

---

participants fell in (Unclear). Total number of studies is provided (n) as well as proportion within the same inferred continental ancestry group (%) unless otherwise specified.

\*Total participants count may be incomplete due to some studies having unclear cohort size. Additionally, this count does not adjust for overlapping participants, i.e. when different studies use the same cohort.

---

726  
727  
728  
729  
730  
731  
732  
733  
734  
735  
736  
737  
738  
739  
740  
741  
742  
743  
744  
745

746

747

Table 2. Demographic characteristics for *All of Us* cohort.

|                                      | <b>AFR</b>  | <b>AMR</b>  | <b>EAS</b> | <b>EUR</b>  | <b>MID</b> | <b>SAS</b> |
|--------------------------------------|-------------|-------------|------------|-------------|------------|------------|
| <b>Total, n</b>                      | 2000        | 3794        | 302        | 4496        | 47         | 132        |
| <b>Mean Age (Standard Deviation)</b> | 50 (16.6)   | 45 (16.1)   | 53 (15.9)  | 61 (16.8)   | 50 (17.5)  | 52 (16.2)  |
| <b>Sex (female), n (%)</b>           | 1535 (76.8) | 3066 (80.8) | 208 (68.9) | 2822 (62.8) | 30 (63.8)  | 83 (62.9)  |
| <b>Blood Type, n (%)</b>             |             |             |            |             |            |            |
| O                                    | 1004 (50.2) | 2179 (57.4) | 122 (40.4) | 1901 (42.3) | 18 (38.3)  | 52 (39.4)  |
| A                                    | 553 (27.7)  | 1104 (29.1) | 91 (30.1)  | 1875 (41.7) | 22 (46.8)  | 38 (28.8)  |
| B                                    | 384 (19.2)  | 437 (11.5)  | 73 (24.2)  | 561 (12.5)  | ≤20 (10.6) | 32 (24.2)  |
| AB                                   | 59 (3.0)    | 74 (2.0)    | ≤20 (5.3)  | 159 (3.5)   | ≤20 (4.3)  | ≤20 (7.6)  |

Each participant is estimated to have AFR (African), AMR (Admixed American), EAS (East Asian), EUR (European), MID (Middle Eastern), or SAS (South Asian) ancestry. Total number of participants is provided (n) as well as proportion within the same ancestry group (%) unless otherwise specified. Aggregate statistics corresponding to fewer than 20 participants are suppressed in compliance with AoURP data and statistics dissemination policy.

748

## Identification of studies via databases and registers

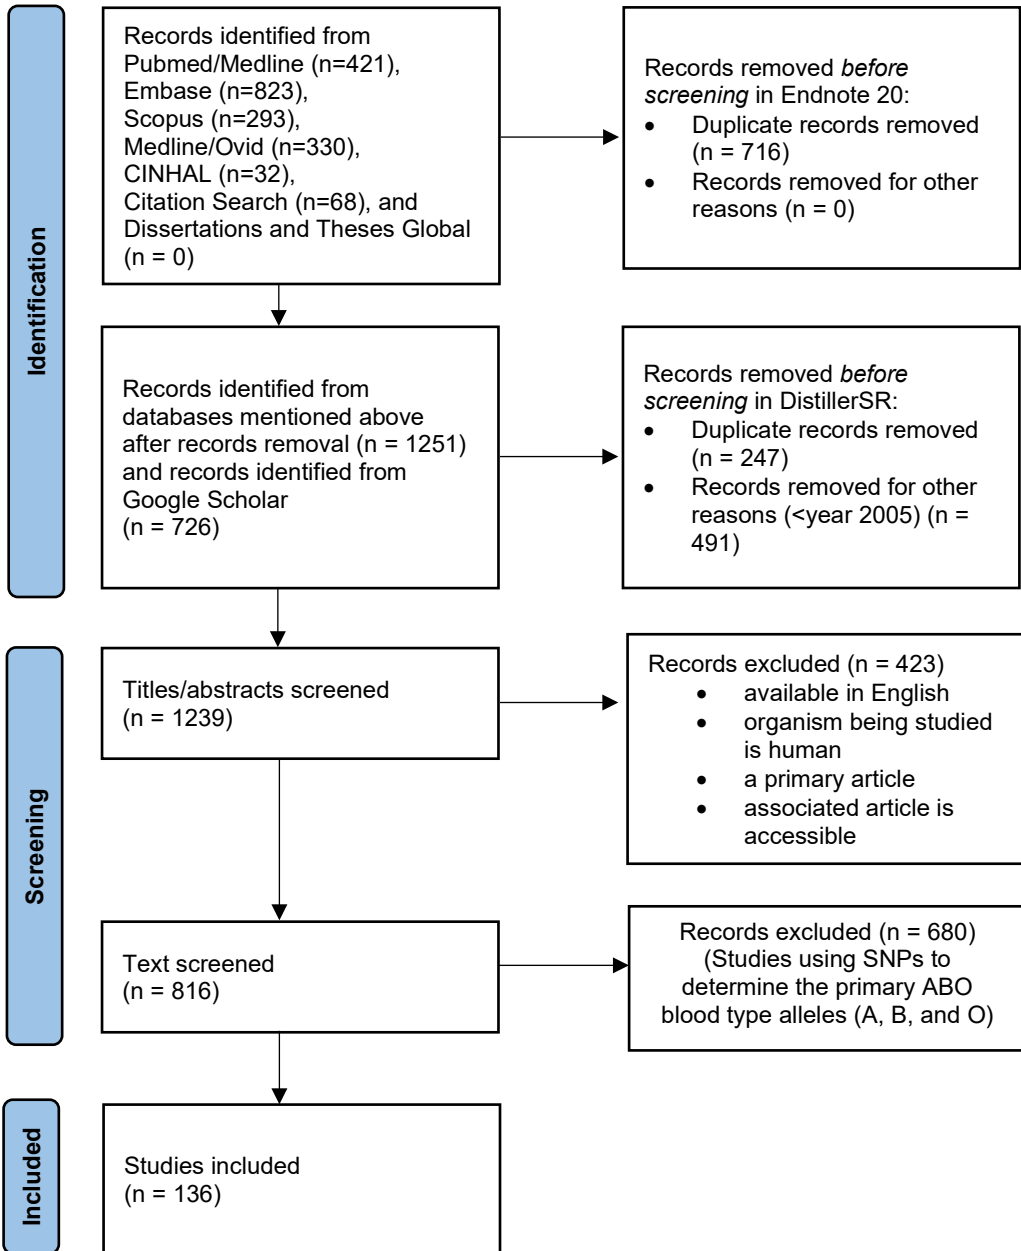



A)

ALL

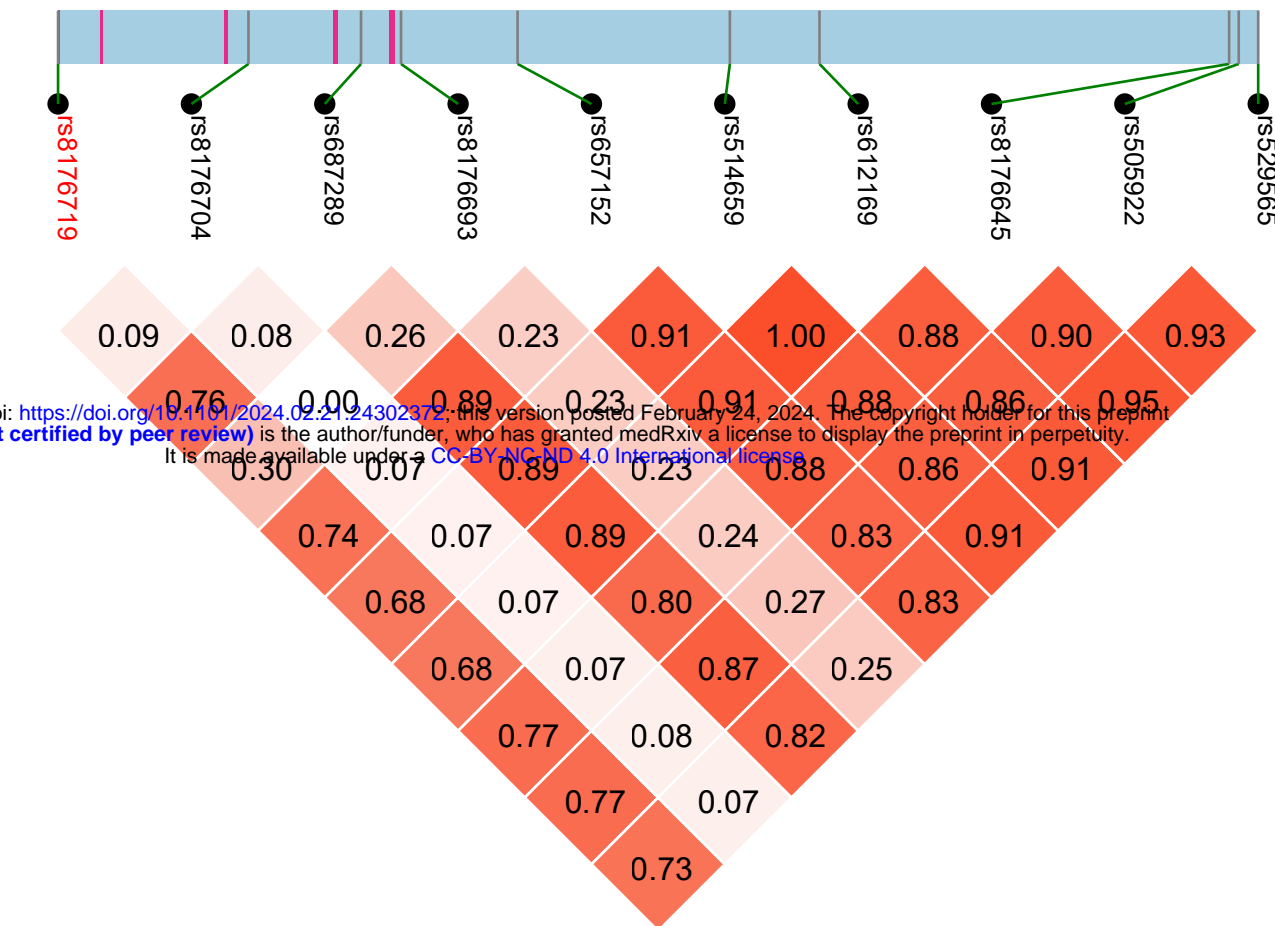

B)

AFR

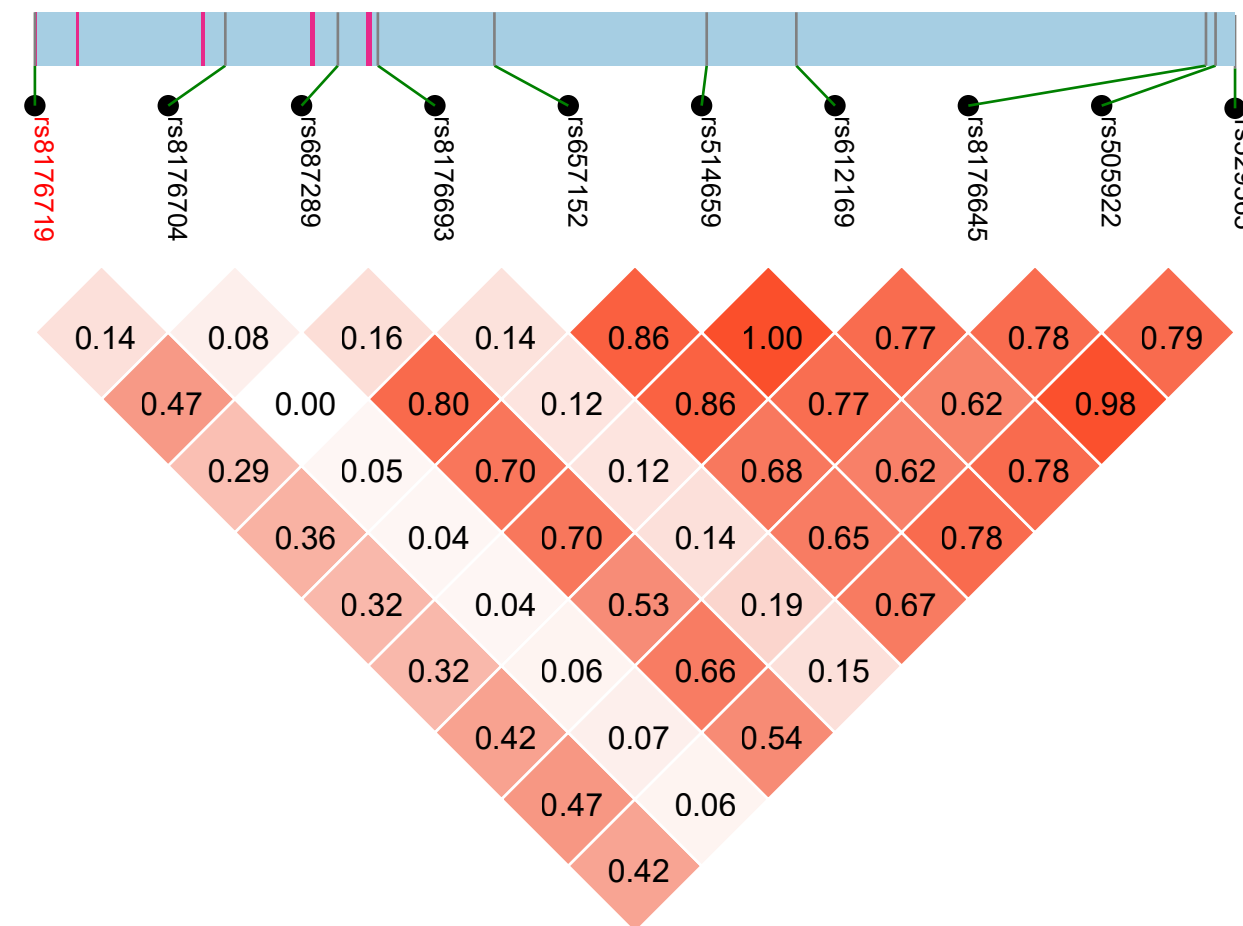

C)

AMR

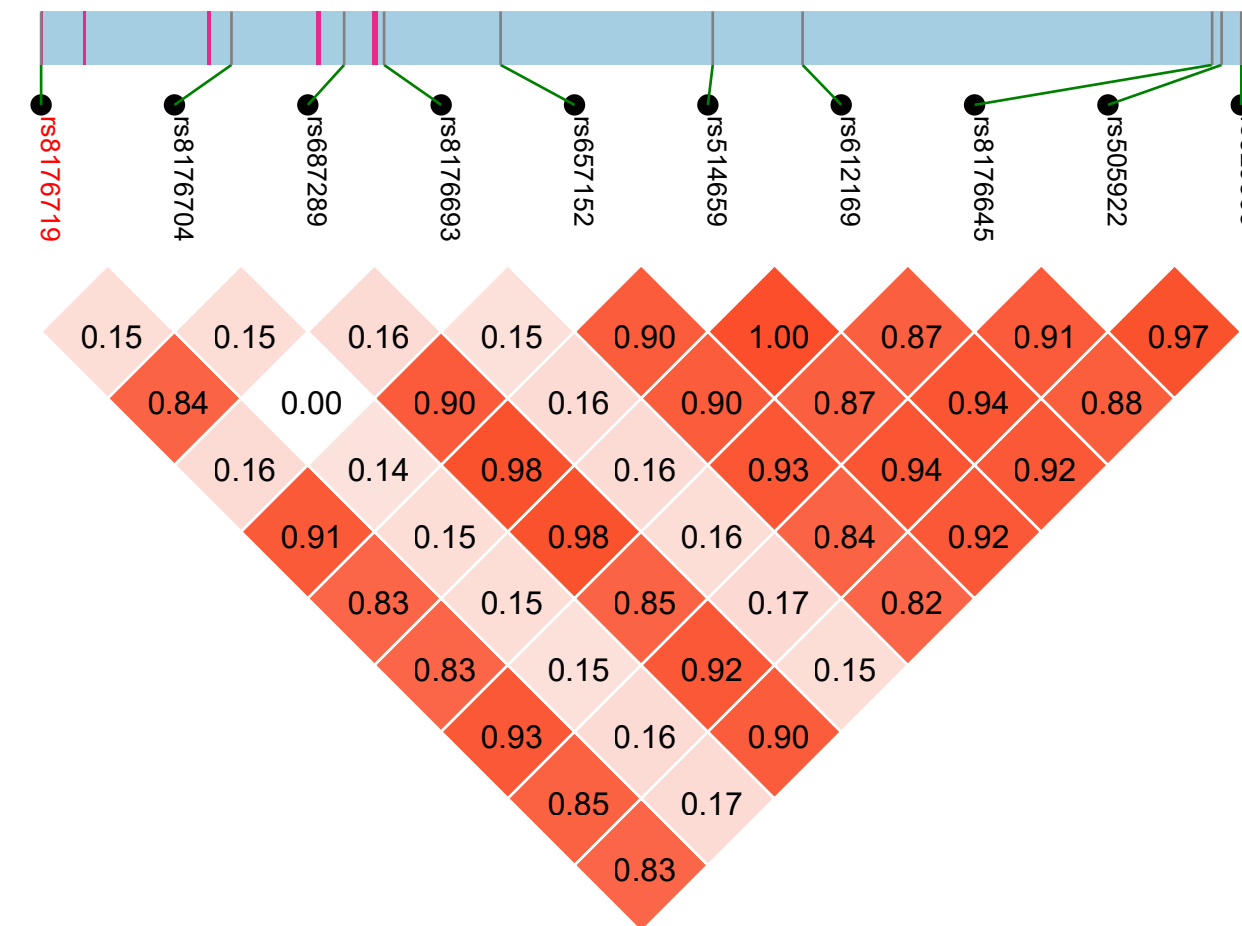

D)

EAS

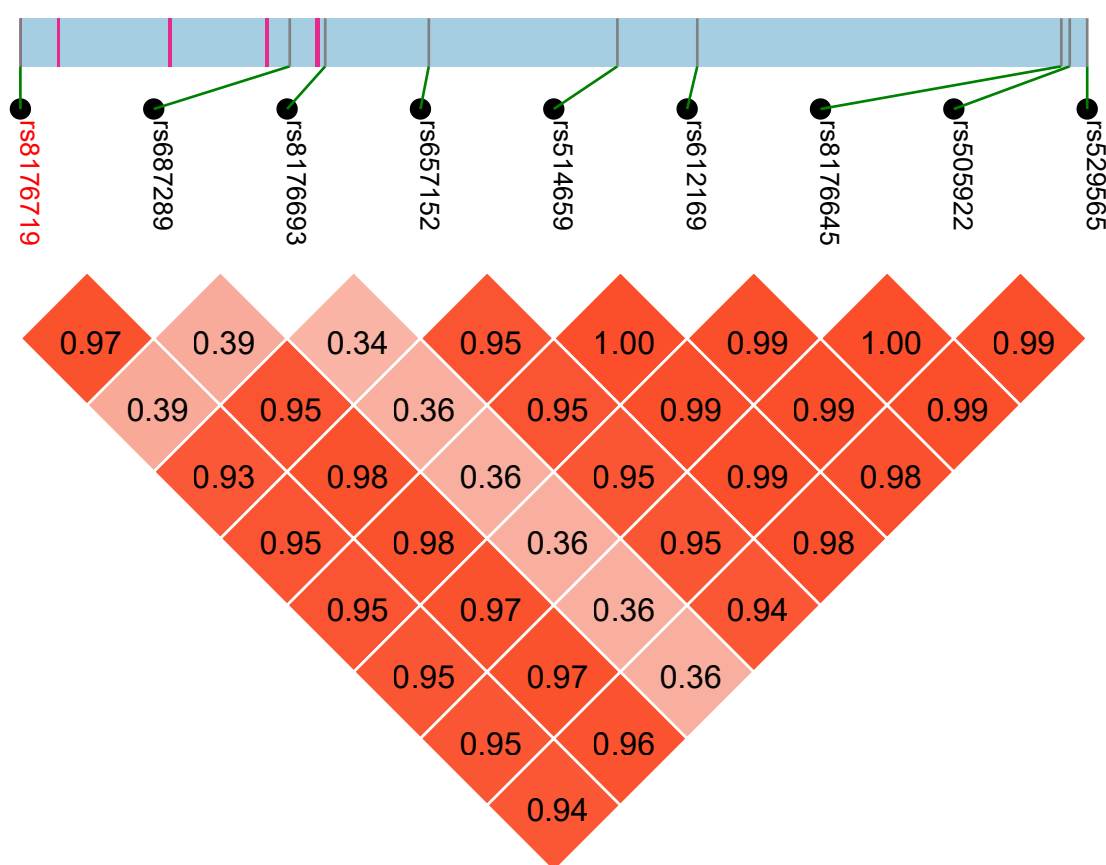

E)

EUR

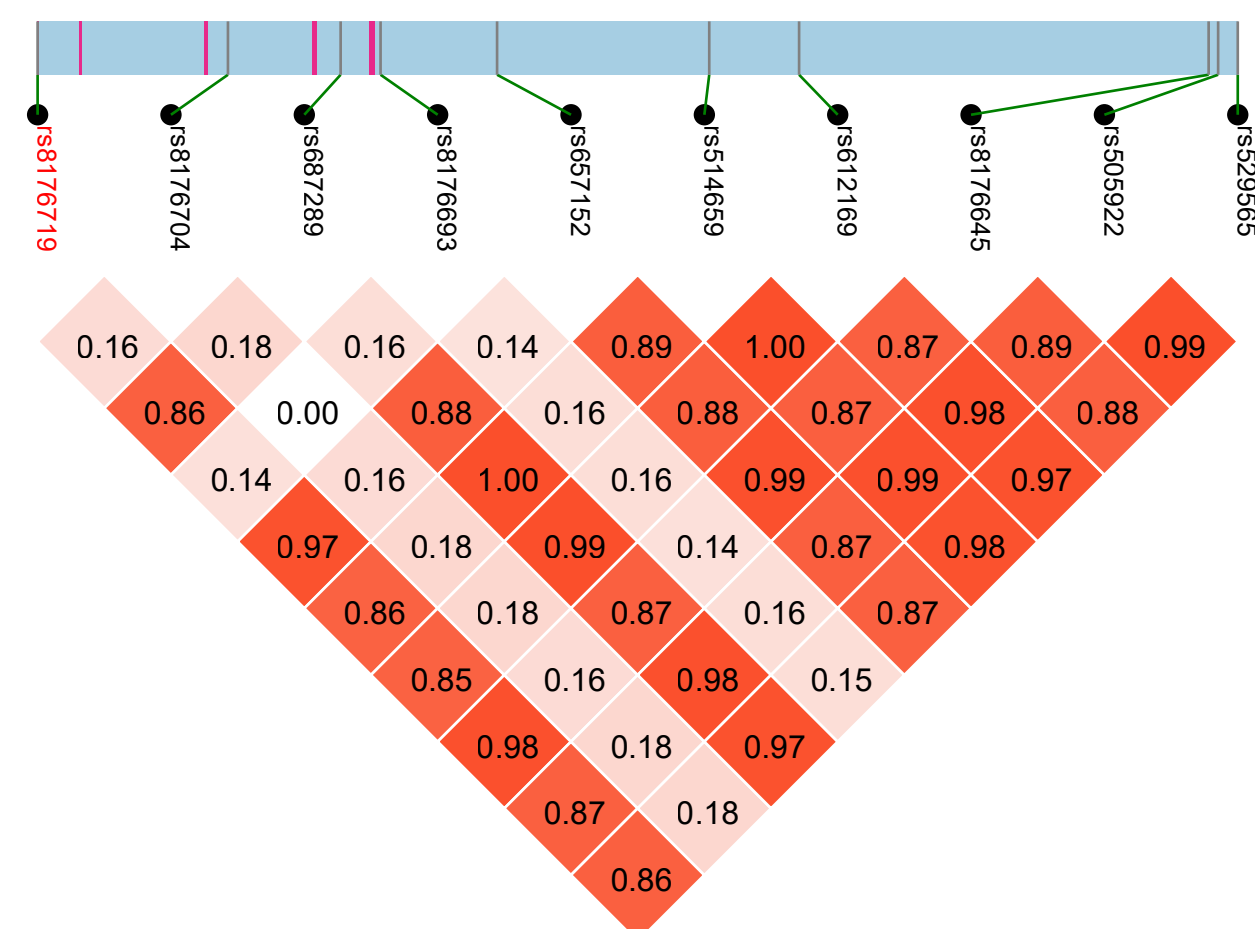

F)

SAS

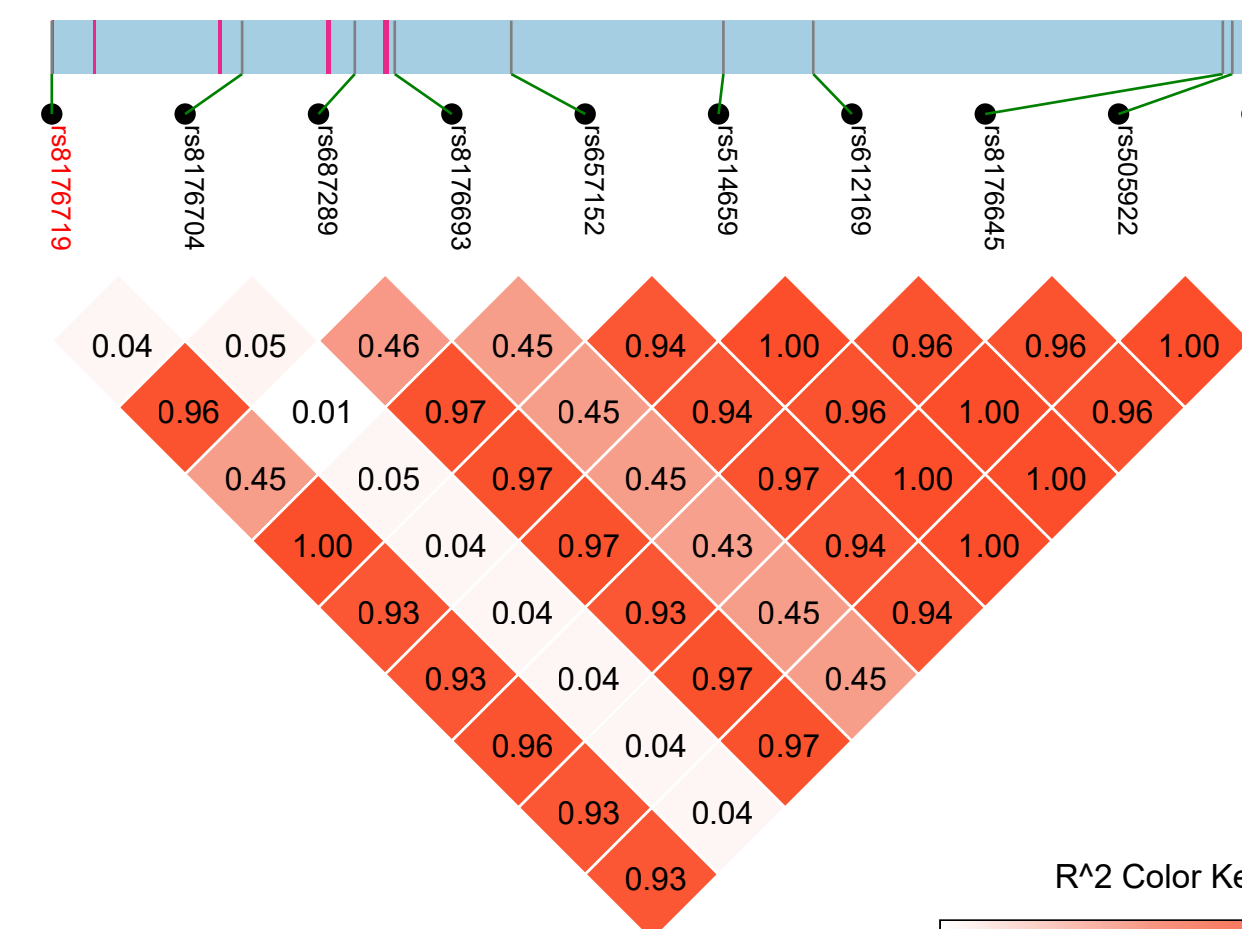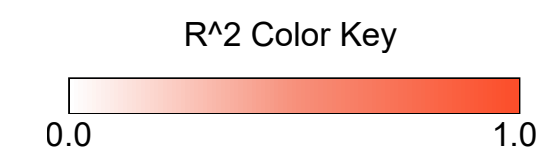

A)

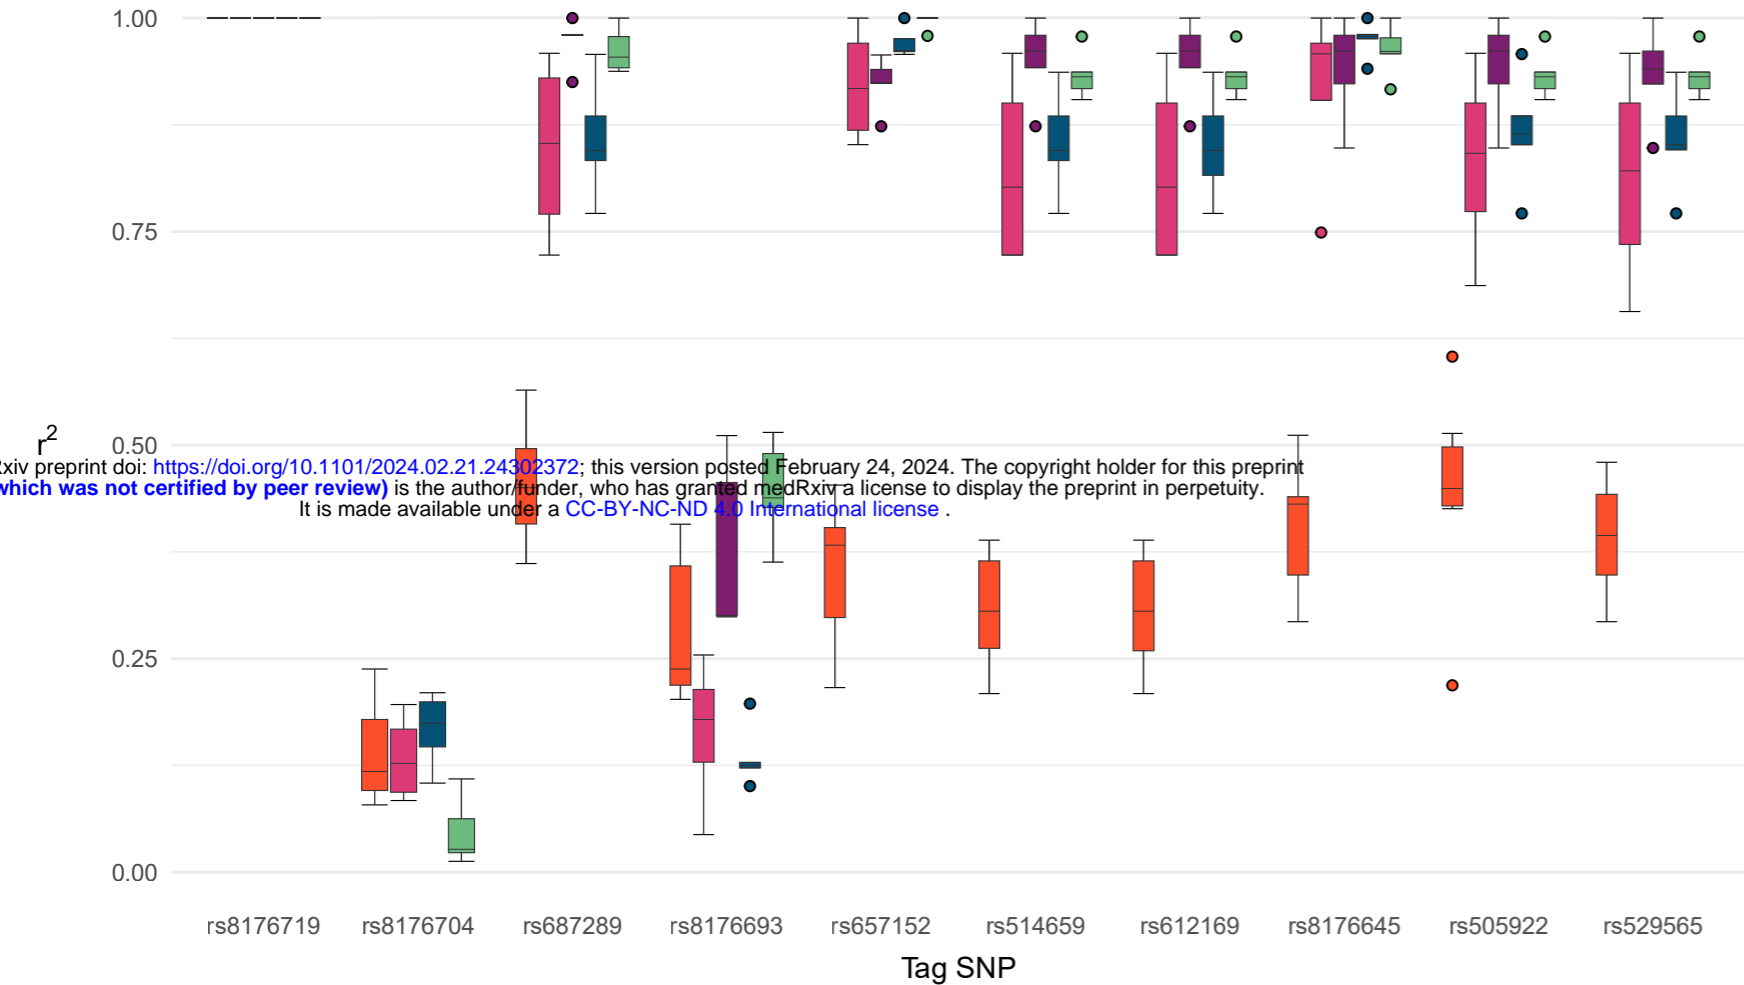

B)

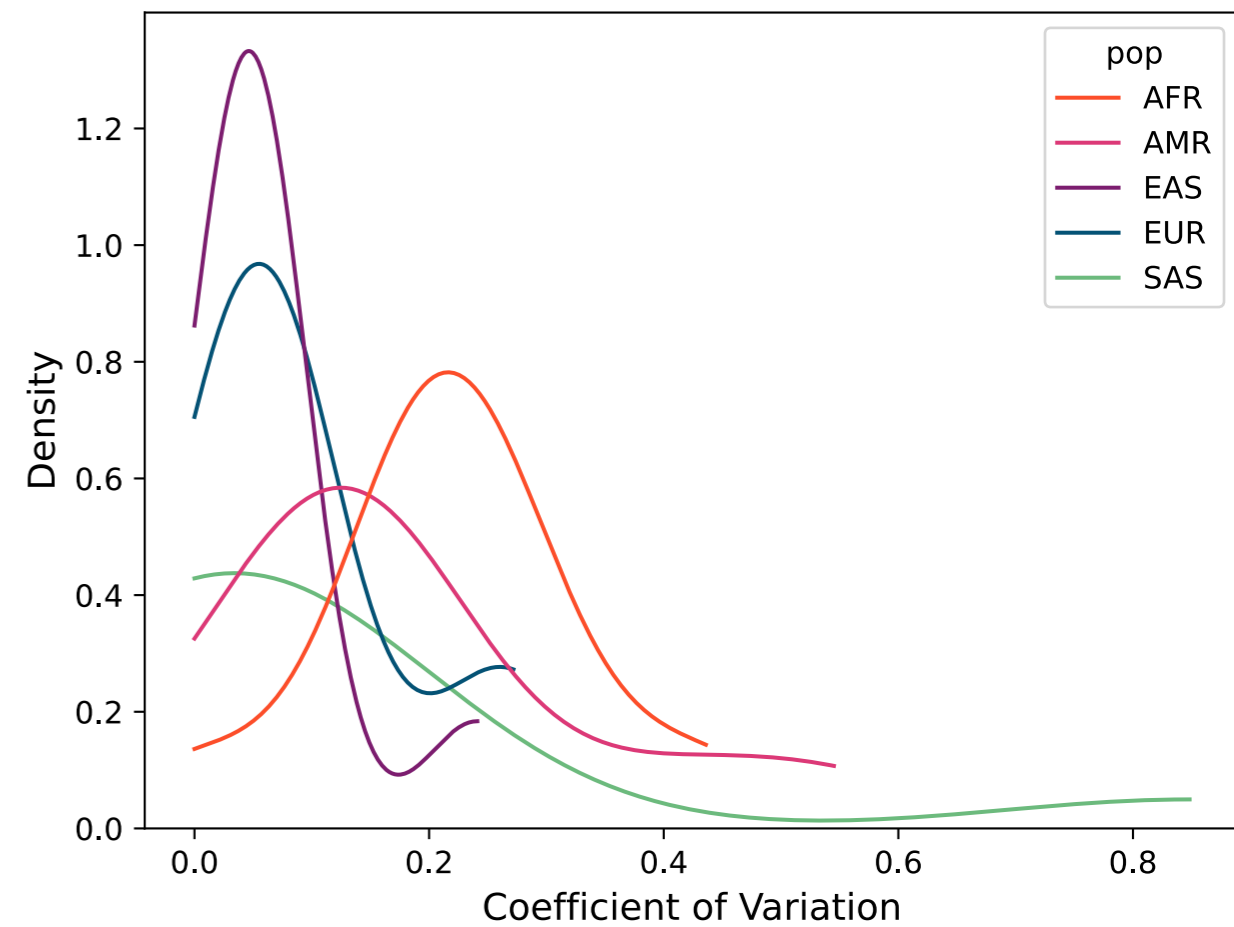

A)

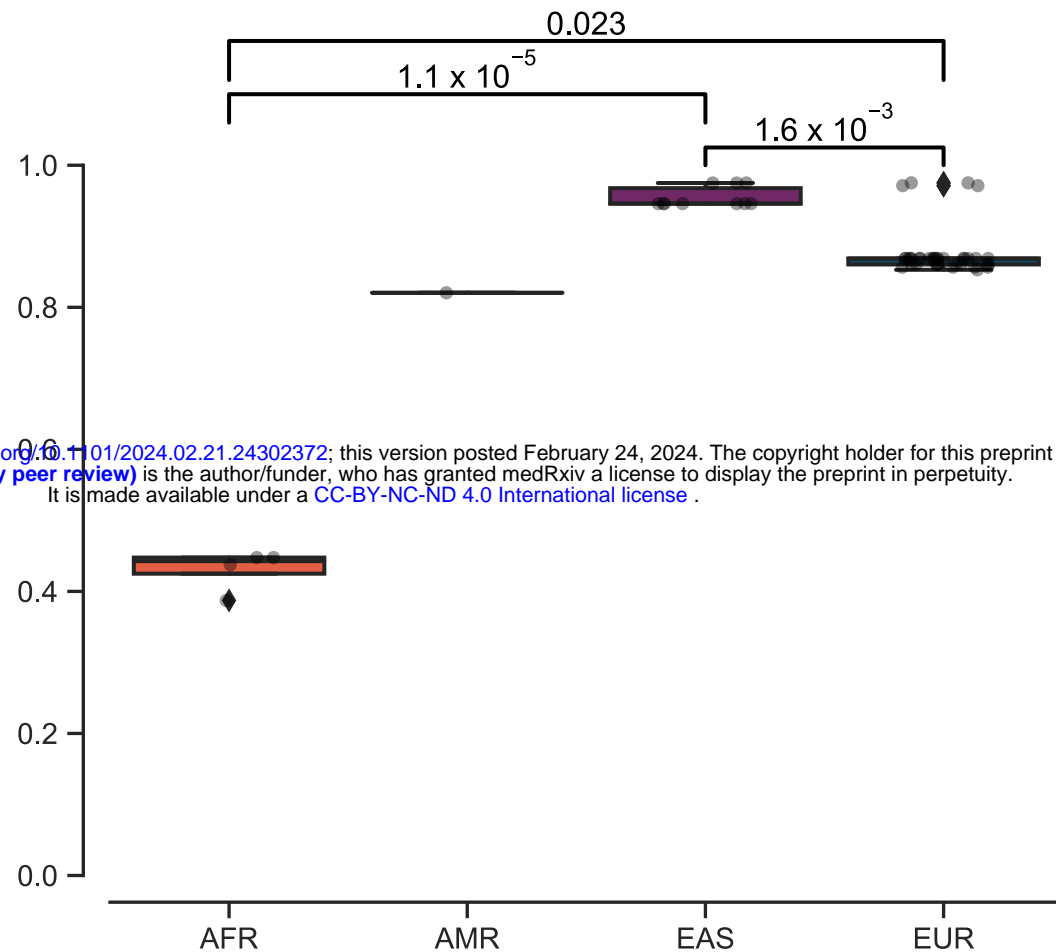

bioRxiv preprint doi: <https://doi.org/10.1101/2024.02.21.24302372>; this version posted February 24, 2024. The copyright holder for this preprint (which was not certified by peer review) is the author/funder, who has granted medRxiv a license to display the preprint in perpetuity. It is made available under a [CC-BY-NC-ND 4.0 International license](https://creativecommons.org/licenses/by-nc-nd/4.0/).

$r^2$

Inferred Continental Ancestry

B)

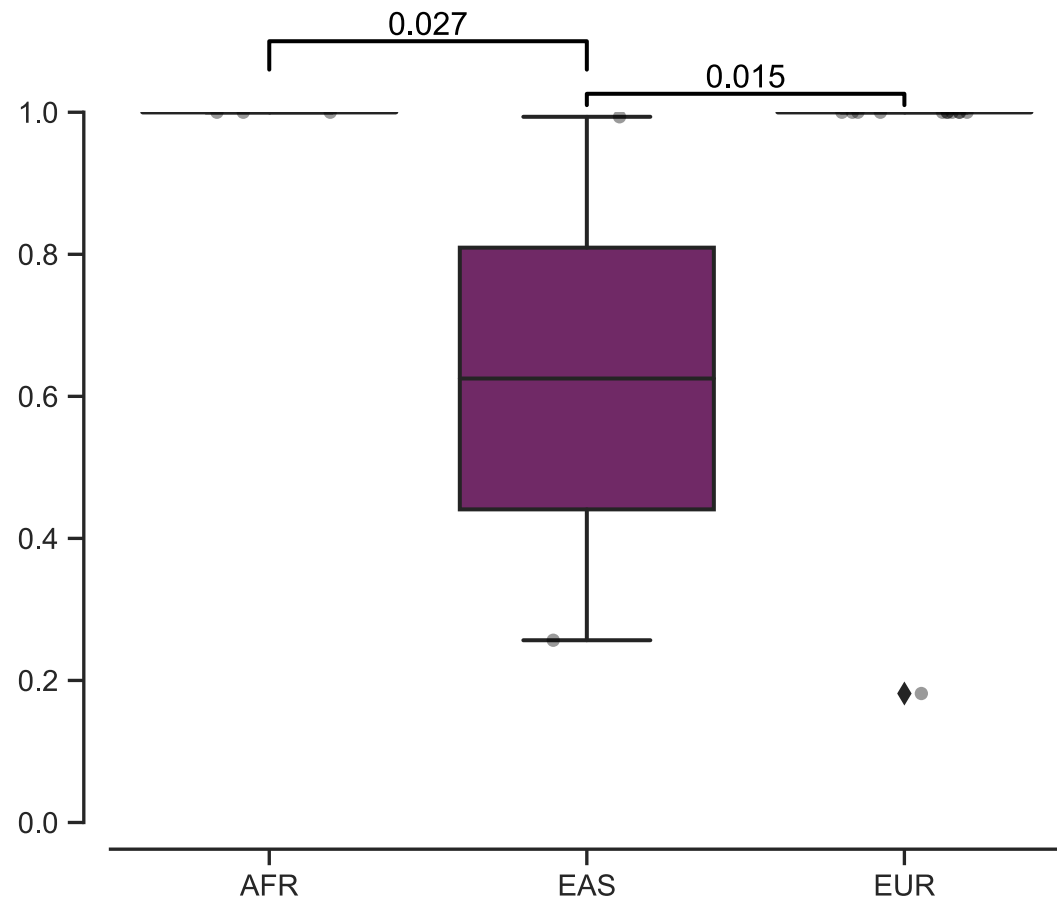

Inferred Continental Ancestry

A)

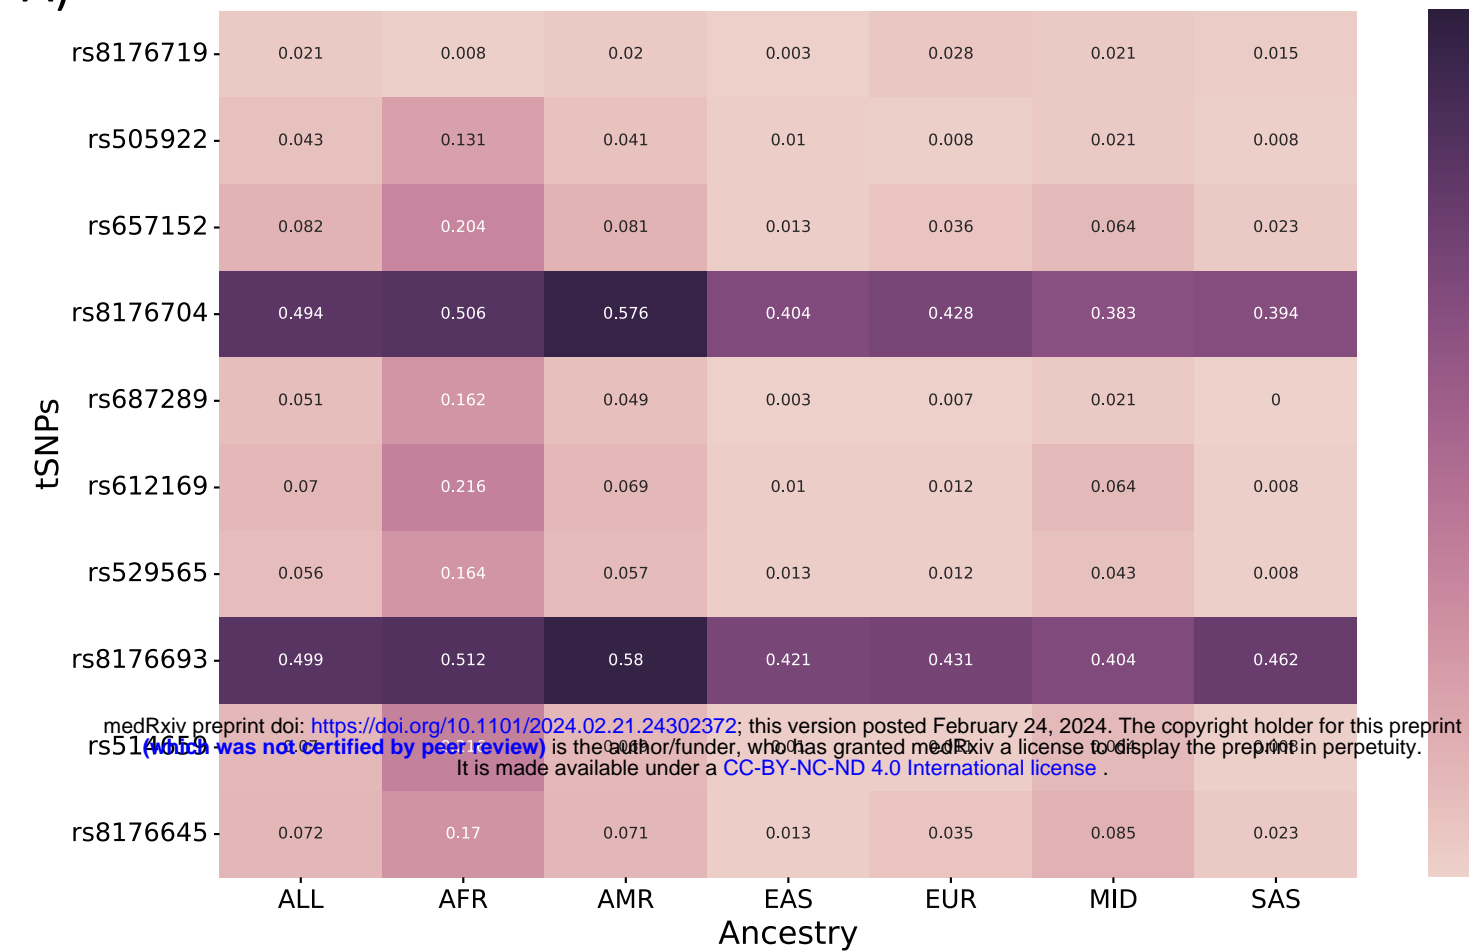

B)

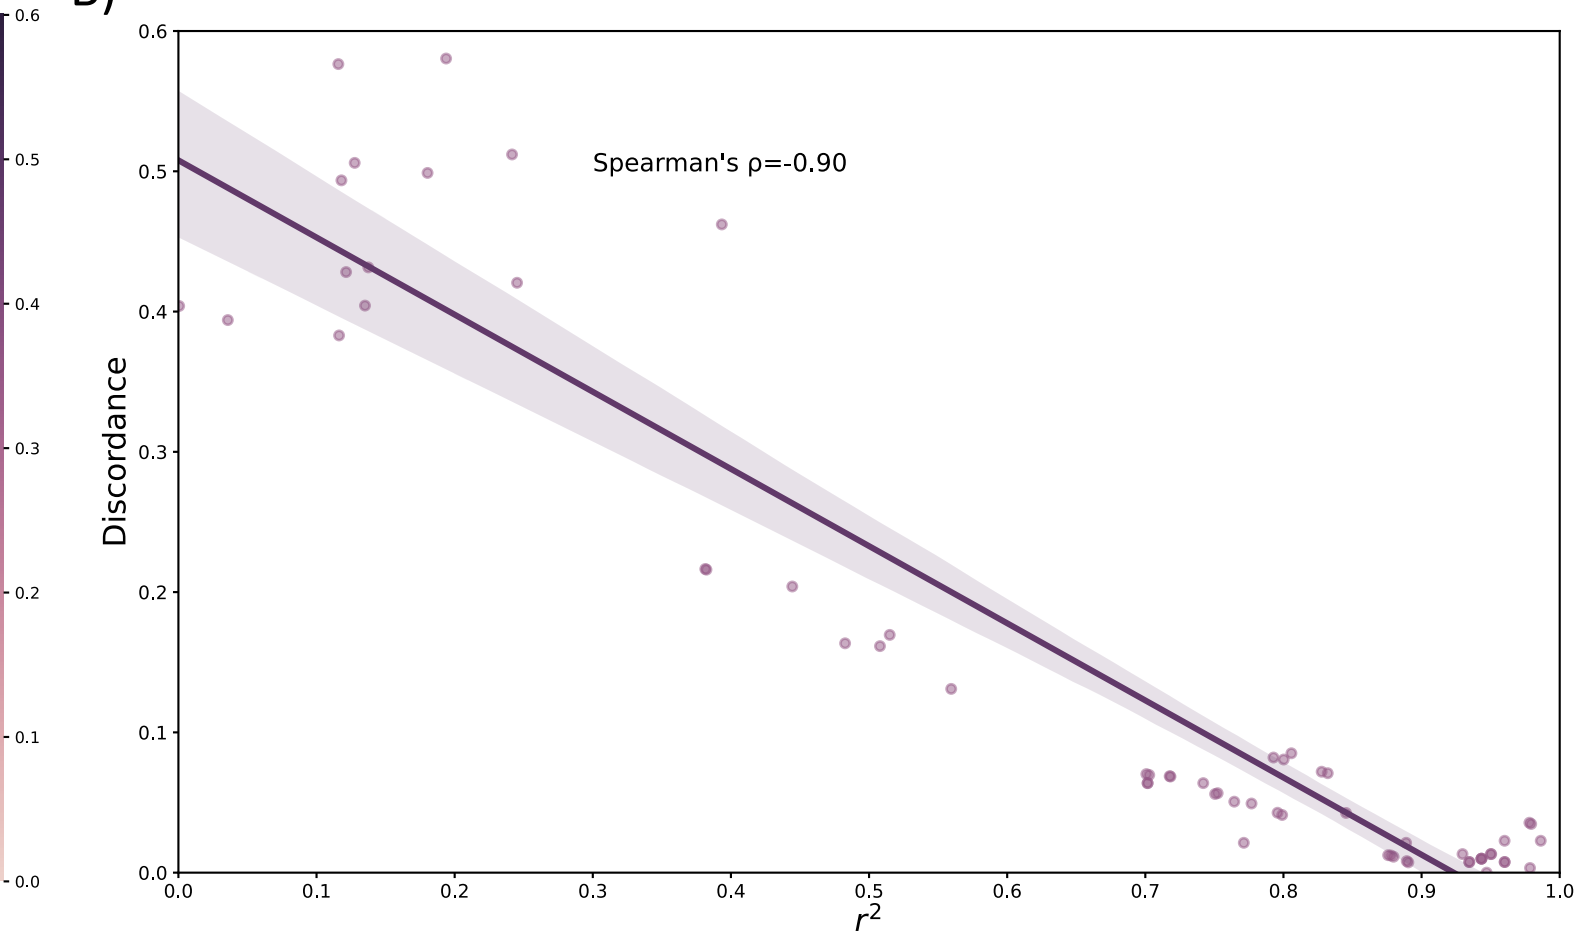

medRxiv preprint doi: <https://doi.org/10.1101/2024.02.21.24302372>; this version posted February 24, 2024. The copyright holder for this preprint (which was not certified by peer review) is the author/funder, who has granted medRxiv a license to display the preprint in perpetuity. It is made available under a [CC-BY-NC-ND 4.0 International license](#).
